# Supplementary material for: Identifying patterns of non-communicable diseases in developed eastern coastal China: a longitudinal study of electronic health records from 12 public hospitals
Source: PubMed Central journal article supplement — BMJ Open. 2017 Oct 5;7(10):e016007. doi: 10.1136/bmjopen-2017-016007 (PMC5639982; doi:10.1136/bmjopen-2017-016007), 2017-10-05
Supplement: bmjopen-2017-016007.draft_revisions.pdf [file bmjopen-2017-016007.draft_revisions.pdf]

# BMJ Open

## Identifying the patterns of non-communicable diseases (NCDs) in developed eastern coastal China: inspiration for NCDs prevention and cure in developing regions

|                                 |                                                                                                                                         |
|---------------------------------|-----------------------------------------------------------------------------------------------------------------------------------------|
| Journal:                        | <i>BMJ Open</i>                                                                                                                         |
| Manuscript ID                   | bmjopen-2017-016007                                                                                                                     |
| Article Type:                   | Research                                                                                                                                |
| Date Submitted by the Author:   | 18-Jan-2017                                                                                                                             |
| Complete List of Authors:       | Yu, Dehua<br>Shi, Jianwei<br>Zhang, Hanzhi<br>Wang, Zhaoxin<br>Lu, Yuan<br>Zhang, Bin<br>Pan, Ying<br>Wang, Bo<br>Sun, Pengfei          |
| <b>Primary Subject Heading</b>: | Health services research                                                                                                                |
| Secondary Subject Heading:      | Evidence based practice, Global health, Health services research, Public health                                                         |
| Keywords:                       | Non-communicable diseases, Electronic Health Record, Eastern coastal China, Health policy < HEALTH SERVICES ADMINISTRATION & MANAGEMENT |
|                                 |                                                                                                                                         |

SCHOLARONE™  
Manuscripts

1  
2  
3  
4 1 **Identifying the patterns of non-communicable diseases**  
5  
6 2 **(NCDs) in developed eastern coastal China: inspiration for**  
7  
8  
9 3 **NCDs prevention and cure in developing regions**

4 Dehua Yu, PhD<sup>1#</sup>, Jianwei Shi, PhD<sup>12#</sup>, Hanzhi Zhang, MD<sup>1</sup>, Zhaoxin Wang, PhD<sup>12\*</sup>,  
5 Yuan Lu, MD<sup>1</sup>, Bin Zhang, MD<sup>1</sup>, Ying Pan, MD<sup>1</sup>, Bo Wang, PhD<sup>1</sup>, Pengfei Sun, BD<sup>2</sup>

6 *1 Department of General Medicine, Yangpu Hospital, Tongji University School of*  
7 *Medicine, Shanghai, 200090, China*

8 *2 Tongji University School of Medicine, Shanghai, 200092, China*

9  
10 Dehua Yu: ydn1404@sina.com

11 Jianwei Shi: shijianwei\_amy@126.com

12 Hanzhi Zhang: drchan001@163.com

13 Zhaoxin Wang: supercell002@sina.com

14 Yuan Lu: lussy@126.com

15 Bin Zhang: metamophore@aliyun.com

16 Ying Pan: hshpanying@163.com

17 Bo Wang: bowang13241@163.com

18 Pengfei Sun: 18817599414@163.com

19  
20 # These authors are co-first authors on this paper.

21 **\*Corresponding author:**

22 **Zhaoxin Wang,**

23 Associate Professor, PhD

24 School of Medicine

25 Tongji University

26 Address: 1239 Si Ping RD, Yangpu District, Shanghai, 200092, China

27 Email: supercell002@sina.com

28 Tel: 86-13918537473

1  
2  
3  
4  
5  
6  
7  
8  
9  
10  
11  
12

---

29 **Identifying the patterns of non-communicable**  
30 **diseases (NCDs) in developed eastern coastal China:**  
31 **inspiration for NCDs prevention and cure in**  
32 **developing regions**

33 Dehua Yu, PhD<sup>1#</sup>, Jianwei Shi, PhD<sup>1,2#</sup>, Hanzhi Zhang, MD<sup>1</sup>, Zhaoxin Wang, PhD<sup>1,2\*</sup>,

34 Yuan Lu, MD<sup>1</sup>, Bin Zhang, MD<sup>1</sup>, Ying Pan, MD<sup>1</sup>, Bo Wang, PhD<sup>1</sup>, Pengfei Sun, BD<sup>2</sup>

35 *1 Department of General Medicine, Yangpu Hospital, Tongji University School of*  
36 *Medicine, Shanghai, 200090, China*

37 *2 Tongji University School of Medicine, Shanghai, 200092, China*

38 #: Dehua Yu and Jianwei Shi are co-first authors on this paper.

39 \* Corresponding author: Zhaoxin Wang, Email: supercell002@sina.com

40 **ABSTRACT**

41 **Objectives:** Few studies have examined the spectrum and trends of inpatients'  
42 non-communicable diseases (NCDs) in eastern coastal China, which is transforming  
43 from an industrial economy to a service-oriented economy and is the most  
44 economically developed region in the country. The aim of this study was to  
45 dynamically elucidate the spectrum and characteristics of the severe NCDs in eastern  
46 coastal China by analysing patients' longitudinal electronic health records.

47 **Setting:** To monitor the spectrum of NCDs dynamically, we extracted data of  
48 electronic health records from 12 general tertiary hospitals in Shanghai from 2003 to  
49 2014. The rankings of and trends in the proportions of different NCDs presented by  
50 inpatients in different gender and age groups were calculated and analysed.

1  
2  
3  
4 51 **Participants:** We obtained a total sample of 1,907,484 inpatients with NCDs from  
5  
6 52 2003 to 2014, among whom 50.05% were male and most were aged 50 years or older  
7  
8 53 (81.53%).

9  
10  
11 54 **Results:** From 2003 to 2014, the prevalence of diabetes, blood and endocrine diseases  
12  
13 55 among inpatients increased approximately four-fold (from 1.36% to 6.74%,  $P<0.001$ )  
14  
15 56 in eastern coastal China. Compared with men, women displayed relatively higher and  
16  
17 57 more stable proportions of digestive diseases ( $P=0.394$ ) and neurological disorders  
18  
19 58 ( $P=0.173$ ) over time. Moreover, the proportion of 21-50-year-old inpatients with  
20  
21 59 diabetes or blood diseases and endocrine diseases skyrocketed over this period  
22  
23 60 ( $P<0.001$ ).

24  
25  
26  
27  
28  
29  
30 61 **Conclusions:** The burden of inpatients' NCDs increased rapidly, particularly among  
31  
32 62 women and younger people. The NCD spectrum observed in eastern coastal China is  
33  
34 63 a good source of evidence for developing prevention guides for regions experiencing  
35  
36 64 transition.

37  
38  
39  
40 65 **Keywords:** Non-communicable diseases; Electronic Health Record; Eastern coastal  
41  
42 66 China; Health policy

43  
44  
45 67 **Strength and limitations**

46  
47  
48 68 ● Previous research in China has primarily focused on the nationwide spectrum, or  
49  
50 69 has studied the major patterns of NCDs in specific regional areas  
51  
52 70 cross-sectionally.

53  
54  
55 71 ● This study aimed at exploring the epidemiological patterns of NCDs in eastern  
56  
57  
58  
59  
60

72 coastal China across 12 consecutive years.

- 73 ● It is a good source of evidence for similar developing regions who are or will go  
74 through transformation to develop NCDs prevention guides or policies.

## 75 INTRODUCTION

76 In recent years, an epidemiological shift in morbidity and mortality from infectious  
77 diseases and malnutrition to non-communicable diseases (NCDs) has occurred in  
78 many countries, including China[1-3]. NCDs have become the major causes of death  
79 in China and globally. According to the 2012 WHO data repository, 87% of deaths in  
80 China were associated with NCDs[1]. The Global Burden of Disease Study (GBD)  
81 revealed that of the 8.3 million deaths in China in 2010, 7.0 million resulted from  
82 NCDs[3]. Stroke, ischaemic heart disease, cancers, and chronic obstructive  
83 pulmonary disease are now the leading causes of premature death in China, and the  
84 burden of these diseases is substantial[4].

85 Previous research on the epidemiological patterns of NCDs in China has primarily  
86 focused on the entire nation or cross-sectional studies of specific regions [1-6].  
87 However, both the WHO and the GBD have acknowledged that a national analysis for  
88 a country as large and diverse as China can mask substantial variations in key  
89 outcomes[3,5]. Also, few have examined the inpatients' NCD spectrum, which can  
90 reflect the more severe condition of NCDs. In this study, we conducted a longitudinal  
91 study of NCD patterns in five provinces in eastern coastal China: Shandong, Jiangsu,  
92 Zhejiang, Shanghai and Guangdong provinces. Geographically speaking, these  
93 provinces are located in the three most productive and dynamic regions of China: the

---

1  
2  
3  
4 94 Bohai Sea, the Yangtze River Delta and the Pearl River Delta. The gross regional  
5  
6 95 domestic product in these five provinces accounts for approximately half that of the  
7  
8  
9 96 32 provinces/autonomous regions/municipalities in China. These provinces' gross  
10  
11 97 domestic product (GDP) per capita far exceeded the average value in China from  
12  
13  
14 98 2005 to 2014[7] and was similar to the GDP of other developed countries in Asia.  
15  
16 99 Moreover, since 2000s, this region experienced dramatic changes in both the  
17  
18  
19 100 economic and health sectors[8]. According to the Health Statistics Yearbook, in 2015,  
20  
21 101 the average life expectancy in eastern coastal China was around 78 years old, which is  
22  
23  
24 102 greater than the national average of approximately 76 years old[7]. Due to the rapid  
25  
26  
27 103 urbanisation, economic development and population ageing in eastern coastal China,  
28  
29 104 NCDs and disabilities are becoming more prevalent[1,3], and the spectrum of  
30  
31 105 inpatients' diseases in this area is speculated to largely differ from that in other  
32  
33  
34 106 regions of China. More specific guidelines for preventing and curing NCDs that are  
35  
36 107 tailored to the disease patterns observed in eastern coastal China must be developed.  
37  
38  
39 108 In exploring disease patterns, particularly in longitudinal studies based on a large  
40  
41  
42 109 sample, second-hand data may be regarded as a good source. In particular, data from  
43  
44  
45 110 hospitals' electronic health record (EHR) systems have unique advantages. For  
46  
47 111 instance, Upshur et al. applied time series methods to a population-based retrospective  
48  
49  
50 112 cohort for the 52 most common causes of hospital admissions in the province of  
51  
52  
53 113 Ontario from 1988 to 2001 and showed that hospital admissions displayed systematic  
54  
55  
56 114 patterns that are understandable, predictable, and reasonably accurate[9]. Using data  
57  
58  
59 115 from the admission and discharge/death register, Sani et al.[10] conducted a  
60

1  
2  
3  
4 116 three-year review of mortality patterns. Their result supported the emerging trend of a  
5  
6 117 combined burden of communicable diseases and NCDs. In China, disease surveillance  
7  
8  
9 118 is conducted by the National Disease Surveillance Points System, which was founded  
10  
11 119 in 1978; however, this system reports primarily on communicable diseases and reports  
12  
13 120 on only a small subset of NCDs, such as cancer[11,12]. Given these factors, the  
14  
15 121 current study used the hospital-based EHR system as a data source. This relatively  
16  
17 122 new database compiles clinical information from a large number of patients in a  
18  
19 123 computationally accessible form. The EHR system provides us with a unique  
20  
21 124 opportunity to elucidate the relatively severe NCD epidemiology and includes a  
22  
23 125 diverse array of NCDs[13].  
24  
25  
26  
27  
28

29 126 The aim of this study was to dynamically elucidate the spectrum and characteristics of  
30  
31 127 the severe NCDs in eastern coastal China by analysing hospitals' longitudinal EHR  
32  
33 128 data. The results can provide insight into the aetiology of NCDs and aid in the  
34  
35 129 development of evidence-based clinical guidelines for preventing and curing NCDs.  
36  
37  
38 130 In addition, the distribution of NCDs in eastern coastal China can inform the  
39  
40 131 development of clinical guidelines for NCDs in other regions or countries in  
41  
42 132 transition.  
43  
44  
45  
46

## 47 133 **METHODS**

### 48 134 **Study design and data collection**

49  
50  
51  
52 135 Longitudinal data (2003-2014) on NCDs were extracted from the EHR systems of 12  
53  
54  
55 136 general tertiary hospitals in Shandong (2 hospitals), Jiangsu (2 hospitals), Zhejiang (2  
56  
57  
58  
59  
60

---

1  
2  
3  
4 137 hospitals), Shanghai (3 hospitals) and Guangdong Provinces (3 hospitals).  
5  
6

7 138 A multistage sample was obtained. To obtain a representative sample, when choosing  
8  
9  
10 139 the sites, we first selected 3 cities that represented high, middle, and low  
11  
12 140 socioeconomic statuses, as defined by GDP level, in each of the 5 provinces. Second,  
13  
14 141 in each city, we selected the largest general tertiary hospital, resulting in 15 sampled  
15  
16 142 hospitals. However, we did not obtain consent from three tertiary hospitals in some  
17  
18 143 cities in Shandong, Jiangsu and Zhejiang Provinces due to political reasons regarding  
19  
20 144 EHR data collection. In China, EHR data are not openly available but can be obtained  
21  
22 145 from consenting hospitals with the help of health authorities. However, for several  
23  
24 146 reasons, the health authorities cannot support us in the future. Thus, 12 general  
25  
26 147 tertiary hospitals were included in the study.  
27  
28  
29  
30  
31  
32

33 148 We selected tertiary hospitals for this study. In China, hospitals are classified into  
34  
35 149 three categories according to their major functions. Although community hospitals are  
36  
37 150 intended to serve as gatekeepers, a patient's freedom to select medical facilities and  
38  
39 151 doctors is not restricted by policies or health insurance coverage. Consequently,  
40  
41 152 patients with acute or chronic diseases frequently visit the higher-tier, more  
42  
43 153 sophisticated or specialised, and more expensive hospitals rather than community  
44  
45 154 health centres, and many of the community health centres do not have hospital beds,  
46  
47 155 and their EHR systems are defective and incomplete, limiting the use of the  
48  
49 156 information contained in them [14]. Typically, the largest tertiary hospitals see most  
50  
51 157 of the patients discharged in their cities.  
52  
53  
54  
55  
56  
57  
58  
59  
60



---

1  
2  
3  
4 158 **Study subjects**  
5  
6

7 159 In this study, information on inpatients with NCDs was extracted from the 2003-2014  
8  
9 160 hospital EHR data of each hospital, and only individuals who had been admitted to  
10  
11 161 these hospitals during this period were included. We chose 2003 as the starting point  
12  
13 162 because the first EHR system was formally launched in these hospitals in that year. In  
14  
15 163 our study, the EHR systems of the tertiary hospitals include the admission information  
16  
17 164 of patients who received their first diagnosis of an NCD between 2003 and 2014. As  
18  
19 165 these hospitals may also attract patients from other districts or provinces, the inclusion  
20  
21 166 criteria stipulated that participants must have a fixed address in the relevant region,  
22  
23 167 regardless of whether they were registered or nonregistered residents. After excluding  
24  
25 168 non-residents, NCD information for a total of 1,907,484 inpatients was stripped of  
26  
27 169 identifying information and extracted from the hospitals' EHR systems. These patients  
28  
29 170 were admitted to a variety of hospital divisions, and according to the ICD-9 and GBD  
30  
31 171 NCD classification, we classified them into various disease groups based on their  
32  
33 172 first-list diagnosis. The final data set included the residents' basic demographic  
34  
35 173 information(gender and age)and the presence of chronic diseases (disease  
36  
37 174 system/category, disorder and year of admission). We did not include region as a  
38  
39 175 factor because all the hospitals were located in an urban region and it is difficult to  
40  
41 176 determine the inpatients' status from the EHR.  
42  
43  
44  
45  
46  
47  
48  
49  
50

51  
52  
53 177 **Statistical analysis**  
54

55  
56 178 All data were analysed by using SAS Software 9.20. Basic descriptive statistics were  
57  
58  
59  
60

---

179 used to analyse the inpatients' personal characteristics (gender, age, and year of  
180 admission). The NCD systems and the most common disorders within each disease  
181 system were ranked according to their relative proportions. The Cochran-Armitage  
182 Chi-square test was then used to examine significant increases or decreases in the  
183 proportions of NCDs in disease systems across different gender and age groups  
184 between 2003 and 2014.

### 185 **Ethics statement**

186 All research activities were conducted with integrity according to generally accepted  
187 ethical principles and were approved by the Ethics Committees of Tongji University  
188 (ref: LL-2016-ZRKX-017). This study presented minimal risk of harm to its subjects,  
189 and the data were collected anonymously. None of the inpatients' personal  
190 information included in the database was available to individuals outside of the  
191 research team.

## 192 **RESULTS**

### 193 **Description of the personal characteristics of inpatients with NCDs**

194 The personal characteristics of the studied population are summarised in Table 1. This  
195 population included 1,907,484 inpatients with NCDs, 50.05% of whom were male.  
196 Most of these patients were aged 50 years or older (81.53%). Furthermore, the  
197 number of inpatients with NCDs increased from 2003 to 2014.

### 198 **Ranking of the disorders in all NCDs categories within gender and age groups**

1  
2  
3  
4 199 The ranks and proportions of all NCDs for each gender group are presented in Table 2.  
5  
6 200 Among males, each of the five most common disorders represented more than 4.0%  
7  
8 201 of the total NCDs from 2003 to 2014. The three most frequently occurring disorders  
9  
10 202 among men were cerebral infarction (12.61%), coronary heart disease (6.94%) and  
11  
12 203 hypertension (6.05%). Similar to the results for men, those for women showed that  
13  
14 204 cerebral infarction (9.63%) occurred most frequently. However, hypertension (6.84%)  
15  
16 205 and uterine fibroids (4.15%) were the second and third most frequently occurring  
17  
18 206 NCDs among women.

19  
20  
21  
22  
23  
24 207 Table 2 also shows the ranks of the most frequently occurring disorders across age  
25  
26 208 groups. There were relatively few inpatients with NCDs in the 0-10-year-old group,  
27  
28 209 but chronic tonsillitis occurred most frequently in this age group (26.19%). In the  
29  
30 210 11-30-year-old group, redundant prepuce and benign neoplasm of the breast occurred  
31  
32 211 frequently in men and women, respectively. Among 31-50-year-old patients, the most  
33  
34 212 common disorders were endocrine diseases, including uterine fibroids, ovarian cysts,  
35  
36 213 endometrial polyps, ureteral calculi and hyperplasia of the mammary glands. Among  
37  
38 214 51-80-year-old inpatients, the most common conditions were cerebral infarction  
39  
40 215 (ranking first), coronary heart disease and hypertension. Among patients aged 80 or  
41  
42 216 older, the three most common disorders were cerebral infarction, hypertension and  
43  
44 217 coronary heart disease. Vertebrobasilar insufficiency, diabetes, and chronic  
45  
46 218 obstructive pulmonary disease were more common among the elderly than among  
47  
48 219 individuals in the other age groups.

49  
50  
51  
52  
53  
54  
55  
56  
57  
58 220 **Distribution of NCDs across different groups from 2003 to 2014**

1  
2  
3  
4 221 Table 3 shows the changes in the proportions of the 12 NCD categories from 2013 to  
5  
6 222 2014. A significant decrease in the occurrence of cancer ( $Z=-20.525$ ,  $P<0.001$ ), other  
7  
8 223 neoplasms ( $Z=-20.525$ ,  $P<0.001$ ), chronic respiratory diseases ( $Z=-18.290$ ,  $P<0.001$ ),  
9  
10 224 urogenital diseases ( $Z=-5.329$ ,  $P<0.001$ ) and sensory organ diseases ( $Z=-2.403$ ,  
11  
12 225  $P=0.008$ ) was found. In contrast, the proportions of other NCDs increased to various  
13  
14 226 extents over the 12-year period. Notably, the proportion of patients with diabetes and  
15  
16 227 blood and endocrine diseases increased approximately four-fold (from 1.36% to  
17  
18 228 6.74%).

19  
20  
21  
22  
23  
24 229 As shown in Figure 1, the 12-year NCD percentages recorded in the hospitals varied  
25  
26 230 widely by gender. The percentage of men who were diagnosed with cancer (from  
27  
28 231 13.62% to 5.91%,  $P<0.001$ ) and chronic respiratory diseases (from 18.80% to 12.42%,  
29  
30 232  $P<0.001$ ) decreased substantially, whereas the percentage of men with diabetes or  
31  
32 233 blood and endocrine diseases (from 0.94% to 6.58%,  $P<0.001$ ) and that of men with  
33  
34 234 neurological disorders (from 2.16% to 4.29%,  $P<0.001$ ) increased substantially. The  
35  
36 235 percentage of women who were diagnosed with digestive diseases ( $Z=-0.270$ ,  
37  
38 236  $P=0.394$ ), neurological disorders ( $Z=0.943$ ,  $P=0.173$ ), and sensory organ diseases  
39  
40 237 ( $Z=0.056$ ,  $P=0.478$ ) did not change significantly from 2003 to 2014; this result is in  
41  
42 238 strong contrast to the pattern found in the male inpatients. Furthermore, a substantial  
43  
44 239 increase in the percentage of female patients with diabetes or blood and endocrine  
45  
46 240 diseases (from 1.77% to 6.91%,  $P<0.001$ ) was found. Although the proportion of  
47  
48 241 cancer and other neoplasms decreased in women, the decrease was less pronounced  
49  
50 242 than that found in men.  
51  
52  
53  
54  
55  
56  
57  
58  
59  
60

1  
2  
3  
4 243 Changes in NCD proportions across age groups were also examined (Figure 2). NCDs  
5  
6 244 were relatively rare among patients aged 10 years or younger, but chronic respiratory  
7  
8 245 diseases occurred most frequently in this group. For 11-20-year-old subjects,  
9  
10 246 sensory organ diseases ( $Z=3.304$ ,  $P<0.001$ ) and cardiovascular and circulatory  
11  
12 247 diseases ( $Z=2.090$ ,  $P=0.018$ ) occurred more frequently over time. We noted dramatic  
13  
14 248 decreases in the percentages of patients with cancer and chronic respiratory diseases  
15  
16 249 in the 31-50-year-old group: all decreased nearly 50% from 2003 to 2014. However,  
17  
18 250 the proportions of patients with diabetes or blood and endocrine diseases increased in  
19  
20 251 these two groups and in the 21-30-year-old group. For the 41-50-year-old group, the  
21  
22 252 number of patients diagnosed with cancer decreased significantly but the proportions  
23  
24 253 of patients with cardiovascular, circulatory ( $Z=7.918$ ,  $P<0.001$ ) and digestive diseases  
25  
26 254 ( $Z=3.086$ ,  $P<0.01$ ) increased to a greater extent than in the younger population. In the  
27  
28 255  $\geq 50$ -year-old group, the proportion of patients with diabetes, blood, and endocrine  
29  
30 256 diseases increased substantially ( $P<0.001$ ). The proportion of patients with cancer  
31  
32 257 decreased to a greater extent in this age group than in any other age group ( $P<0.001$ ).  
33  
34  
35  
36  
37  
38  
39  
40  
41  
42

## 43 **DISCUSSION**

44  
45 259 By analysing the EHR information of inpatients with NCDs at 12 hospitals in eastern  
46  
47 260 coastal China, our research team was able to elucidate the severe NCD patterns in a  
48  
49 261 relatively unbiased fashion and to confirm that NCDs displayed regional  
50  
51 262 heterogeneity to some extent. In order of frequency, cardiovascular and circulatory  
52  
53 263 diseases, urogenital diseases, chronic respiratory diseases, and digestive diseases were  
54  
55 264 the most common NCDs. When comparing these data with inpatient data in other  
56  
57  
58  
59  
60

---

1  
2  
3  
4 265 regions, we found different patterns. For instance, a study using a sample from a  
5  
6 266 hospital in central China found that cardiovascular and circulatory diseases, diabetes,  
7  
8  
9 267 and chronic respiratory diseases occurred most frequently[15]. However, since most  
10  
11 268 studies on inpatients' NCDs were based on only one hospital's EHR data, the  
12  
13  
14 269 comparison may have defects. In eastern coastal China, the severe cardiovascular and  
15  
16 270 circulatory diseases may be the most frequently occurring because of the greater  
17  
18  
19 271 degree of urbanisation and greater proportion of ageing population in the region[2,3].  
20  
21 272 In addition, urogenital diseases (second) and digestive diseases (fourth) were common  
22  
23  
24 273 in this region, potentially because of the more rapid pace of modern life, more  
25  
26 274 sedentary lifestyle and longer working hours. In our search of existing studies on  
27  
28  
29 275 inpatients with NCDs, we rarely found this spectrum at the top of the list[16].  
30  
31  
32 276 Concerning the longitudinal trends in inpatients' NCDs, the results showed a  
33  
34 277 significant increase in the proportions of many NCDs, including diabetes, blood and  
35  
36  
37 278 endocrine diseases, and cardiovascular and circulatory diseases, from 2003 to 2014.  
38  
39 279 However, interestingly, the proportion of chronic respiratory diseases and cancer  
40  
41  
42 280 inpatients decreased over the 12-year period, in stark contrast to the changes in the  
43  
44  
45 281 incidence observed throughout China[17,18]. Often, previous studies have concluded  
46  
47 282 that the incidence of respiratory diseases is increasing, likely due to ambient air  
48  
49  
50 283 pollution and tobacco use, resulting in tremendous threats to respiratory health[3,19].  
51  
52 284 The difference may be caused by the data since the incidence also includes mild  
53  
54  
55 285 respiratory diseases, however, the opposite trend of inpatients found in eastern coastal  
56  
57 286 China may have also resulted from this region's transition from a heavy industrial  
58  
59  
60

1  
2  
3  
4 287 district to a technologically focused area, which has been associated with a substantial  
5  
6 288 reduction in environmental pollution. Moreover, regional public health media  
7  
8  
9 289 campaigns focused on cancer prevention and the regional government have promoted  
10  
11 290 early screening and the treatment of major cancers since the 2000s[20], which likely  
12  
13  
14 291 explains the reduced proportion of cancer patients. However, PM 2.5 air pollution,  
15  
16 292 household pollution, tobacco use, residents' insufficient knowledge of NCD  
17  
18  
19 293 prevention, etc. remain persistent risk factors in eastern coastal China and deserve  
20  
21 294 considerable attention[21, 22].  
22  
23

24 295 Demographic factors may result in physiological and psychological differences across  
25  
26  
27 296 different populations, which may then give rise to distinct behaviours and ultimately  
28  
29  
30 297 to a heterogeneous distribution of NCDs. For instance, the Framingham Heart Study  
31  
32 298 (FHS) conducted in the USA showed that women were significantly older than men at  
33  
34 299 their first stroke, had a higher stroke rate than men at ages above 85 years, lower rates  
35  
36  
37 300 than men at all other ages, and a higher life time risk of stroke than men at all  
38  
39  
40 301 ages[23]. Our study found a significant increase in the proportion of male and female  
41  
42 302 inpatients with diabetes, blood and endocrine diseases, cardiovascular and circulatory  
43  
44 303 diseases, and congenital anomalies in eastern coastal China. However, we identified  
45  
46  
47 304 demographic differences in the patterns of NCDs. The proportion of male inpatients  
48  
49  
50 305 with digestive diseases decreased, but that of female inpatients remained relatively  
51  
52 306 high. The proportion of female patients with mental and behavioural disorders  
53  
54  
55 307 increased. Currently, women in China are employed in the same fast-paced jobs or  
56  
57 308 roles as men, which is likely one important cause of this phenomenon[24].  
58  
59  
60

1  
2  
3  
4 309 Furthermore, women are expected to devote more effort to balancing family and  
5  
6 310 work[25,26], which is undoubtedly challenging. On the other hand, we found an  
7  
8  
9 311 increasing trend in the number of men diagnosed with neurological diseases, which  
10  
11 312 may be associated with the complex aetiology of dystrophia, immune damage,  
12  
13 313 endocrine disorders, etc. Diet and stress may also influence the incidence of these  
14  
15 314 diseases among men to a certain extent and should be closely examined.

16  
17  
18  
19 315 In our study, we found that, on the one hand, a greater proportion of older inpatients  
20  
21 316 (>50 years) suffered from NCDs such as diabetes or blood and endocrine diseases as  
22  
23 317 they aged. This proportion increased nearly four-fold from 2003 to 2014. On the other  
24  
25 318 hand, the proportion of inpatients between the ages of 30 and 50 with these diseases  
26  
27 319 increased significantly. In addition, the proportion of young patients with NCDs, such  
28  
29 320 as cardiovascular and circulatory diseases, increased over the 12-year period. As  
30  
31 321 shown in Figure 2, cancer was not among the most common NCDs in any age group,  
32  
33 322 and surprisingly, the proportion of patients with cancer decreased in all age groups but  
34  
35 323 decreased more quickly in older age groups. This phenomenon is likely highly  
36  
37 324 correlated with improvements to the environment and the effects of cancer prevention  
38  
39 325 media campaigns[27-29]. However, this result does not imply that cancer prevention  
40  
41 326 can be abated in the future.

42  
43  
44  
45 327 The public's awareness of NCD prevention is insufficient due to complex cultural and  
46  
47 328 social factors[27,30,31]. The specific risk factors for frequently occurring NCDs in  
48  
49 329 different gender and age groups should be monitored every year. Other interventions,  
50  
51 330 such as reform of China's medical system, should aim to improve the function of  
52  
53  
54  
55  
56  
57  
58  
59  
60



1  
2  
3  
4 331 community hospitals such that these hospitals focus on NCD prevention. Meanwhile,  
5  
6 332 education or training should be promoted in communities and among health  
7  
8 333 practitioners. Knowledge of and information on NCDs should be disseminated via the  
9  
10 334 media to increase awareness. The distributions of NCDs in eastern coastal China  
11  
12 335 suggest future directions for NCD prevention in this region and may provide similar  
13  
14 336 developing regions with strategies for better managing NCDs.  
15  
16  
17  
18

### 19 337 **Limitations**

20  
21  
22 338 In this study, there were several limitations. First, the sampled hospitals were the  
23  
24 339 largest hospitals in eastern coastal cities. These cities were selected to increase the  
25  
26 340 sample's representativeness of eastern coastal China. However, the generalisability  
27  
28 341 and reliability of the findings are a concern. However, because the EHR included a  
29  
30 342 large number of inpatients with NCDs, it was a precise data source for determining  
31  
32 343 the status of and trends in the occurrence of different diseases. To reduce selection  
33  
34 344 bias, more representative hospitals from each of the cities must be investigated.  
35  
36 345 Second, because few longitudinal studies examining the spectrum of NCDs among  
37  
38 346 many hospitals' inpatients have been conducted in other areas of China, it was  
39  
40 347 difficult to compare the current findings regarding inpatients' NCDs with those in  
41  
42 348 other parts of China.  
43  
44  
45  
46  
47  
48

### 49 349 **CONCLUSIONS**

50  
51  
52 350 In summary, the spectrum of NCDs inpatients from 12 hospitals exhibits the severe  
53  
54 351 NCDs condition and spectrum in eastern coastal China to a certain extent. Specific  
55  
56  
57  
58  
59  
60

1  
2  
3  
4 352 NCDs rapidly increased in women and the younger population over the studied  
5  
6 353 12-year period, underscoring the importance of healthcare policies or guidelines for  
7  
8  
9 354 developing countries or regions such as China. Public awareness campaigns should be  
10  
11 355 targeted at the regional level and should consider differences in demographic factors  
12  
13 356 across regions. However, due to the limited generalisability and reliability of this  
14  
15 357 study, stronger support must be obtained through future studies on the spectrum of  
16  
17  
18 358 inpatients' NCDs in eastern coastal China and other regions.

## 359 **Abbreviations**

360 Non-communicable diseases: NCDs

361 GDP: Gross domestic product

## 362 **Acknowledgements**

363 The authors appreciate the assistance of all the hospitals involved in this research  
34  
35  
36 364 project in collecting the data.

## 365 **Funding**

366 The design of this study was financially supported by the Shanghai Health Policy  
41  
42  
43 367 Program (2016HP043). Data collection, analysis and interpretation were funded as  
44  
45  
46 368 part of a Central University Special Funds for Scientific Research Project  
47  
48  
49 369 (1500219099), and the writing and revision of the manuscript was funded by the  
50  
51 370 Natural Science Foundation of China (71603182).

## 371 **Availability of data and materials**

372 All relevant data are available in the Figshare database under the DOI:

1  
2  
3  
4 373 <https://figshare.com/s/f79b2b4e686d1d477527>

5  
6 374 **Authors' contributions**

7  
8 375 Conceived and designed the experiments: DHY, JWS and ZXW. Analysed the data:

9  
10 376 JWS, HZZ and YL. Contributed reagents/materials/analysis tools: YL, BZ, YP, BW

11  
12 377 and PFS. Wrote the paper: DHY and JWS.

13  
14 378 **Competing interests**

15  
16 379 The authors have declared that they have no competing interests.

17  
18  
19  
20  
21 380

22  
23  
24  
25 381 **REFERENCES**

- 26  
27 382 [1] World Health Organization, Non Communicable Diseases Progress Monitor  
28  
29 383 2015,  
30  
31 384 [http://apps.who.int/iris/bitstream/10665/184688/1/9789241509459\\_eng.pdf](http://apps.who.int/iris/bitstream/10665/184688/1/9789241509459_eng.pdf)  
32  
33 385 (accessed 1 Apr 2016).  
34  
35 386 [2] Lim SS, Vos T, Flaxmanet AD, et al. A comparative risk assessment of burden  
36  
37 387 of disease and injury attributable to 67 risk factors and risk factor clusters in  
38  
39 388 21 regions, 1990-2010: a systematic analysis for the Global Burden of Disease  
40  
41 389 Study 2010. *Lancet*, 2012;380(9859):2224-2260.  
42  
43 390 doi:10.1016/S0140-6736(12)61766-8.  
44  
45 391 [3] Yang G, Wang Y, Zeng Y, et al. Rapid health transition in China, 1990-2010:  
46  
47 392 findings from the Global Burden of Disease Study 2010. *Lancet*, 2013;  
48  
49 393 381(9882):1987-2015. doi:10.1016/S0140-6736(13)61097-1.  
50  
51 394 [4] Liu Y, Yang G, Zeng Y, et al. Policy dialogue on China's changing burden of  
52  
53  
54  
55  
56  
57  
58  
59  
60

- 1  
2  
3  
4 395 disease. *Lancet*, 2013; 381(9882):1961-1962.  
5  
6 396 doi:10.1016/S0140-6736(13)61031-4.  
7  
8  
9 397 [5] Fang P, Dong S, Xiao J, et al. Regional inequality in health and its  
10  
11 398 determinants: evidence from China. *Health Policy*, 2010; 94(1):14-25.  
12  
13 399 doi:10.1016/j.healthpol.2009.08.002.  
14  
15  
16 400 [6] Tang S, Meng Q, Chen L, et al. Tackling the challenges to health equity in  
17  
18 401 China. *Lancet*, 2008; 372(9648):1493-1501.  
19  
20  
21 402 doi:10.1016/S0140-6736(08)61364-1.  
22  
23  
24 403 [7] National Bureau of Statistics of the People's Republic of China, China  
25  
26 404 Statistical Bulletin, 2015, <http://www.stats.gov.cn/tjsj/tjgb/ndtjgb/>(accessed 1  
27  
28 405 Apr 2016).  
29  
30  
31 406 [8] Liu GF, Sun MP, Wang ZY, et al. Association analysis between urbanization  
32  
33 407 and non-communicable diseases and health-related behavior. *Journal of*  
34  
35 408 *Peking University. Health Sciences(Chinese Journal)*, 2016;48(3):478-482.  
36  
37  
38  
39 409 [9] Upshur RE, Moineddin R, Crighton E, et al. Simplicity within complexity:  
40  
41 410 seasonality and predictability of hospital admissions in the province of Ontario  
42  
43 411 1988-2001, a population-based analysis. *BMC Health Services Research*, 2005;  
44  
45 412 5(1): 13. doi:10.1186/1472-6963-5-13.  
46  
47  
48  
49 413 [10] Sani MU, Mohammed AZ, Bapp A, et al. A three-year review of mortality  
50  
51 414 patterns in the medical wards of Aminu Kano Teaching Hospital, Kano,  
52  
53 415 Nigeria. *Nigerian Postgraduate Medical Journal*, 2007;14(4):347-351.  
54  
55  
56 416 [11] Duan L, Deng X, Wang Y, et al. The National injury surveillance system in  
57  
58  
59  
60

- 1  
2  
3  
4 417 China: a six-year review. *Injury*, 2015;46(4):572-579.  
5  
6 418 doi:10.1016/j.injury.2014.12.013.  
7  
8  
9 419 [12] Zhu M, Ruan W, Fei SJ, et al. Approaches to the evaluation of malaria  
10  
11 elimination at county level: case study in the Yangtze River Delta region.  
12  
13 421 *Advances in Parasitology*, 2014;86:135-182.  
14  
15 422 doi:10.1016/B978-0-12-800869-0.00006-8.  
16  
17  
18 423 [13] Melamed RD, Khiabani H, Rabadan R. Data-driven discovery of seasonally  
19  
20 linked diseases from an electronic health records system. *BMC Bioinformatics*,  
21  
22 424 2014; 15 (Suppl 6):S3. doi:10.1186/1471-2105-15-S6-S3.  
23  
24  
25 425  
26 426 [14] Yang H, Huang X, Zhou X, et al. Determinants of initial utilization of  
27  
28 community healthcare services among patients with major non-communicable  
29  
30 chronic diseases in south China. *PLOS ONE*, 2014;9(12):e116051.  
31  
32 428 doi:10.1371/journal.pone.0116051.  
33  
34  
35 429  
36 430 [15] Zhou L. Analysis of the chronic diseases components of inpatient in a hospital  
37  
38 of Wuhan from 2008-2012. *Medicine and Society*, 2014;10:23-25.  
39  
40  
41 432 [16] Zhu YJ, Yao YH, Xue SS, et al. Analysis on condition of chronic diseases,  
42  
43 distribution of disease spectrum and main risk factors of diseases of elderly in  
44  
45 Jilin Province. *Journal of Jilin University (Medicine Edition)(Chinese Journal)*,  
46  
47 434 2013;6:1275-1281.  
48  
49  
50 435  
51 436 [17] World Health Organization, Global Health Observatory Data Repository, 2016,  
52  
53 437 <http://apps.who.int/gho/data/node.main.A865?lang=en> (accessed 3 Apr 2016).  
54  
55  
56 438 [18] Oyebo O, Pape UJ, Lavery AA, et al. Rural, urban and migrant differences  
57  
58  
59  
60

- 1  
2  
3  
4 439 in non-communicable disease risk-factors in middle income countries: a  
5  
6 440 cross-sectional study of WHO-SAGE data. *PLOS ONE*, 2015;10(4): e0122747.  
7  
8  
9 441 doi:10.1371/journal.pone.0122747.
- 10  
11 442 [19] Tao Y, Mi S, Zhou S, Wang S, Xie X. Air pollution and hospital admissions for  
12  
13 443 respiratory diseases in Lanzhou, China. *Environmental Pollution*,  
14  
15 444 2014;185:196-201. doi:10.1016/j.envpol.2013.10.035.
- 16  
17  
18 445 [20] Li DL, Zheng Y, Lu W. Practice and probe into prevention and control for high  
19  
20 446 incidence cancers in Shanghai. *China Cancer(Chinese Journal)*,  
21  
22 447 2010;19:80-85.
- 23  
24  
25 448 [21] Tu ZG. The coordination of industrial growth with environment and resource.  
26  
27 449 *Economic Research Journal(Chinese Journal)*, 2008; 2:93-105.
- 28  
29  
30 450 [22] Wu F. Shanghai, China – Study on Global Ageing and Adult Health-2009/10,  
31  
32 451 WAVE, 2013,  
33  
34 452 <http://apps.who.int/healthinfo/systems/surveydata/index.php/catalog/141>  
35  
36 453 (accessed 3 Jan 2016).
- 37  
38  
39 454 [23] Petrea RE, Beiser AS, Seshadri S, et al. Gender differences in stroke incidence  
40  
41 455 and post stroke disability in the Framingham Heart Study. *Stroke*, 2009; 40(4):  
42  
43 456 1032-1037. doi:10.1161/STROKEAHA.108.542894.
- 44  
45  
46 457 [24] Liu LN. Analysis on the overstrain women in the workforce in China. *Reform*  
47  
48 458 *& Opening(Chinese Journal)*, 2013;1:33-34.
- 49  
50  
51 459 [25] Yang H, He F, Wang T, et al. Health-related lifestyle behaviors among male  
52  
53 460 and female rural-to-urban migrant workers in Shanghai, China. *PLOS ONE*,

- 1  
2  
3  
4 461 2015;10(2):e0117946. doi:10.1371/journal.pone.0117946.
- 5  
6 [26] Du M, Prescott J, Kraft P, et al. Physical activity, sedentary behavior, and  
7  
8 leukocyte telomere length in women. *American Journal of Epidemiology*,  
9  
10 463 2012;175(5):414-422. doi:10.1093/aje/kwr330.  
11  
12 464
- 13  
14 [27] Ding D, Zhong X, Lau JT, Oldenburg B. Behavioral medicine and prevention  
15  
16 of non-communicable diseases in China: current challenges and future  
17  
18 directions. *International Journal of Behavioral Medicine*, 2014; 21(4): 584-589.  
19  
20 467  
21 468 doi:10.1007/s12529-014-9393-7.
- 22  
23  
24 [28] Zhai F, Wang H, Du S, et al. Prospective study on nutrition transition in China.  
25  
26 *Nutrition Reviews*, 2009; 67(suppl. 1):S56-S61.  
27  
28 470  
29 471 doi:10.1111/j.1753-4887.2009.00160.x.
- 30  
31 [29] Monda KL, Adair LS, Zhai F, et al. Longitudinal relationships between  
32  
33 occupational and domestic physical activity patterns and body weight in China.  
34  
35 *European Journal of Clinical Nutrition*, 2008;62(11):1318-1325.  
36  
37 474  
38 475 doi:10.1038/sj.ejcn.1602849.
- 39  
40  
41 [30] Gool CHV, Kempen GI, Penninx BW, et al. Chronic disease and lifestyle  
42  
43 transitions: results from the Longitudinal Aging Study Amsterdam. *Journal of*  
44  
45 *Aging and Health*, 2007;19(3):416-438. doi:10.1177/0898264307300189.  
46  
47 478
- 48  
49 [31] Cheng L, Tan L, Zhang L, et al. Chronic disease mortality in rural and urban  
50  
51 residents in Hubei Province, China, 2008-2010. *BMC Public Health*,  
52  
53 480  
54 481 2013;13:713. doi:10.1186/1471-2458-13-713.  
55  
56  
57  
58  
59  
60

Table 1 Demographic Characteristics of Inpatients with NCDs

| Variable          | Classification | N       | %      |
|-------------------|----------------|---------|--------|
| Gender            | Male           | 954612  | 50.05  |
|                   | Female         | 952872  | 49.95  |
| Age<br>(years)    | 0-10           | 1008    | 0.05   |
|                   | 11-20          | 14688   | 0.77   |
|                   | 21-30          | 47484   | 2.49   |
|                   | 31-40          | 70164   | 3.68   |
|                   | 41-50          | 219060  | 11.48  |
|                   | 51-60          | 320172  | 16.79  |
|                   | 61-70          | 268176  | 14.06  |
| Year of admission | 71-80          | 523452  | 27.44  |
|                   | >80            | 443280  | 23.24  |
|                   | 2003           | 110796  | 5.81   |
|                   | 2004           | 126744  | 6.64   |
|                   | 2005           | 127704  | 6.69   |
|                   | 2006           | 135972  | 7.13   |
|                   | 2007           | 141780  | 7.43   |
|                   | 2008           | 145728  | 7.64   |
|                   | 2009           | 155220  | 8.14   |
|                   | 2010           | 157500  | 8.26   |
| 2011              | 171060         | 8.97    |        |
| 2012              | 191004         | 10.01   |        |
| 2013              | 209100         | 10.96   |        |
| 2014              | 234876         | 12.31   |        |
| Total             |                | 1907484 | 100.00 |



Table 2 Ranking of the Most Common NCDs by Group

| Variable   | First Disease       | N(%)          | Second Disease            | N(%)         | Third Disease                 | N(%)        | Fourth Disease                        | N(%)        | Fifth Disease                         | N(%)        |
|------------|---------------------|---------------|---------------------------|--------------|-------------------------------|-------------|---------------------------------------|-------------|---------------------------------------|-------------|
| Gender     |                     |               |                           |              |                               |             |                                       |             |                                       |             |
| Male       | Cerebral infarction | 120396(12.61) | Coronary heart disease    | 66216(6.94)  | Hypertension                  | 57708(6.05) | Chronic obstructive pulmonary disease | 53904(5.65) | Chronic bronchitis                    | 45252(4.74) |
| Female     | Cerebral infarction | 91776(9.63)   | Hypertension              | 65136(6.84)  | Uterine fibroid               | 39564(4.15) | Coronary heart disease                | 31188(3.27) | Chronic bronchitis                    | 25776(2.71) |
| Age(years) |                     |               |                           |              |                               |             |                                       |             |                                       |             |
| 0-10       | Chronic tonsillitis | 264(16.19)    | Redundant prepuce         | 144(14.29)   | Adenoid vegetation            | 72(7.14)    | Adenoidal hypertrophy                 | 48(4.76)    | Tonsil hypertrophy                    | 24(2.38)    |
| 11-20      | Redundant prepuce   | 2064(14.05)   | Benign neoplasm of breast | 996(6.78)    | Spontaneous pneumothorax      | 648(4.41)   | Chronic tonsillitis                   | 552(3.76)   | Respiratory failure                   | 444(3.02)   |
| 21-30      | Redundant prepuce   | 4704(9.91)    | Benign neoplasm of breast | 2448(7.51)   | Ovarian cyst                  | 3564(5.16)  | Ureteral calculi                      | 1632(3.44)  | Chronic tonsillitis                   | 1032(2.17)  |
| 31-40      | Uterine fibroid     | 5484(7.82)    | Ovarian cyst              | 3156(4.50)   | Endometrial polyp             | 2844(4.05)  | Ureteral calculi                      | 2556(3.64)  | Hyperplasia of mammary glands         | 2268(3.23)  |
| 41-50      | Uterine fibroid     | 25644(11.71)  | Endometrial hyperplasia   | 9408(4.29)   | Hyperplasia of mammary glands | 8052(3.68)  | Endometrial polyp                     | 7404(3.38)  | Ureteral calculi                      | 5640(2.57)  |
| 51-60      | Cerebral infarction | 23124(7.22)   | Coronary heart disease    | 14016(4.38)  | Hypertension                  | 12144(3.79) | Ureteral calculi                      | 8364(2.61)  | Cerebral haemorrhage                  | 6636(2.07)  |
| 61-70      | Cerebral infarction | 29508(11.00)  | Coronary heart disease    | 14016(6.30)  | Hypertension                  | 13668(5.10) | Vertebrobasilar insufficiency         | 6480(2.42)  | Diabetes                              | 5640(2.10)  |
| 71-80      | Cerebral infarction | 75972(14.51)  | Hypertension              | 45612(8.71)  | Coronary heart disease        | 38808(7.41) | Chronic bronchitis                    | 30720(5.87) | Chronic obstructive pulmonary disease | 25536(4.88) |
| >80        | Cerebral infarction | 46560(17.58)  | Hypertension              | 31488(10.50) | Coronary heart disease        | 77928(8.51) | Chronic obstructive pulmonary disease | 36216(8.17) | Chronic bronchitis                    | 37728(7.10) |

Table 3 Distribution of Non-communicable Diseases from 2003 to 2014 in the Total Sample (%)

| Disorder                                  | 2003    | 2004    | 2005    | 2006    | 2007    | 2008    | 2009    | 2010    | 2011    | 2012    | 2013    | 2014    | Z       | P-value | Trend |
|-------------------------------------------|---------|---------|---------|---------|---------|---------|---------|---------|---------|---------|---------|---------|---------|---------|-------|
|                                           | N       | N       | N       | N       | N       | N       | N       | N       | N       | N       | N       | N       |         |         |       |
|                                           | =110796 | =126744 | =127704 | =135972 | =141780 | =145728 | =155220 | =157500 | =171060 | =191004 | =209100 | =234876 |         |         |       |
| Cancer                                    | 11.57   | 10.16   | 8.15    | 9.33    | 8.37    | 8.28    | 7.24    | 7.18    | 7.19    | 7.80    | 6.12    | 5.78    | -20.525 | <0.001  | ↓↓↓   |
| Other neoplasms                           | 6.63    | 8.05    | 7.43    | 7.41    | 5.58    | 4.55    | 5.54    | 4.45    | 4.67    | 4.55    | 4.36    | 4.01    | -20.527 | <0.001  | ↓↓↓   |
| Cardiovascular and circulatory diseases   | 28.30   | 29.38   | 29.18   | 29.52   | 31.43   | 33.33   | 34.68   | 36.21   | 35.64   | 35.65   | 34.87   | 34.60   | 19.861  | <0.001  | ↑↑↑   |
| Chronic respiratory diseases              | 13.43   | 13.46   | 13.85   | 12.98   | 13.50   | 12.85   | 12.52   | 12.45   | 11.27   | 10.89   | 9.37    | 9.40    | -18.290 | <0.001  | ↓↓↓   |
| Diabetes and blood and endocrine diseases | 1.36    | 1.43    | 1.25    | 1.26    | 1.44    | 1.46    | 1.35    | 1.75    | 1.55    | 3.67    | 6.47    | 6.74    | 41.268  | <0.001  | ↑↑↑   |
| Digestive diseases                        | 10.54   | 11.57   | 10.98   | 11.24   | 9.58    | 10.56   | 10.00   | 10.81   | 10.12   | 9.67    | 10.00   | 10.98   | -2.757  | 0.003   | ↓↓    |
| Mental and behavioural disorders          | 0.17    | 0.08    | 0.23    | 0.19    | 0.19    | 0.13    | 0.26    | 0.25    | 0.16    | 0.12    | 0.36    | 0.25    | 3.130   | 0.001   | ↑↑    |
| Musculoskeletal disorders                 | 5.44    | 4.74    | 4.85    | 4.64    | 5.18    | 4.48    | 4.58    | 3.86    | 4.67    | 4.54    | 5.80    | 6.23    | 4.668   | <0.001  | ↑↑↑   |
| Urogenital diseases                       | 14.97   | 13.24   | 15.95   | 14.93   | 15.68   | 14.65   | 13.29   | 13.12   | 15.34   | 14.81   | 13.83   | 12.72   | -5.329  | <0.001  | ↓↓↓   |
| Neurological disorders                    | 2.25    | 3.78    | 4.35    | 3.96    | 4.58    | 5.34    | 5.33    | 4.97    | 4.83    | 3.49    | 4.13    | 4.36    | 3.915   | <0.001  | ↑↑↑   |
| Sensory organ diseases                    | 4.14    | 3.20    | 2.69    | 3.15    | 3.50    | 2.97    | 3.64    | 3.18    | 2.84    | 3.26    | 3.02    | 3.15    | -2.403  | 0.008   | ↓↓    |
| Congenital anomalies                      | 0.40    | 0.44    | 0.28    | 0.38    | 0.37    | 0.26    | 0.49    | 0.41    | 0.32    | 0.28    | 0.60    | 0.63    | 3.750   | <0.001  | ↑↑↑   |
| Skin and subcutaneous disease             | 0.80    | 0.47    | 0.82    | 0.99    | 0.59    | 1.14    | 1.06    | 1.35    | 1.38    | 1.26    | 1.08    | 1.15    | 7.294   | <0.001  | ↑↑↑   |

↓ ↓ : P<0.01, negative trend; ↓ ↓ ↓ : P<0.001, negative trend; ↑↑: P<0.01, positive trend; ↑↑↑: P<0.001, positive trend.

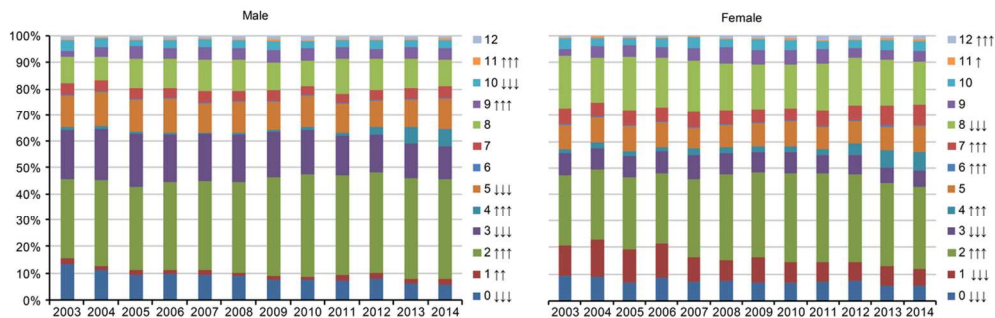

Fig.1 Distribution of non-communicable diseases by gender

0: cancer, 1: other neoplasms, 2: cardiovascular and circulatory diseases, 3: chronic respiratory diseases, 4: diabetes and blood and endocrine diseases, 5: digestive diseases, 6: mental and behavioural disorders, 7: musculoskeletal disorders, 8: urogenital diseases, 9: neurological disorders, 10: sensory organ diseases, 11: congenital anomalies, 12: skin and subcutaneous diseases

↓: P<0.05, negative trend; ↓↓: P<0.01, negative trend; ↓↓↓: P<0.001, negative trend;

↑: P<0.05, positive trend; ↑↑: P<0.01, positive trend; ↑↑↑: P<0.001, positive trend.

55x17mm (600 x 600 DPI)

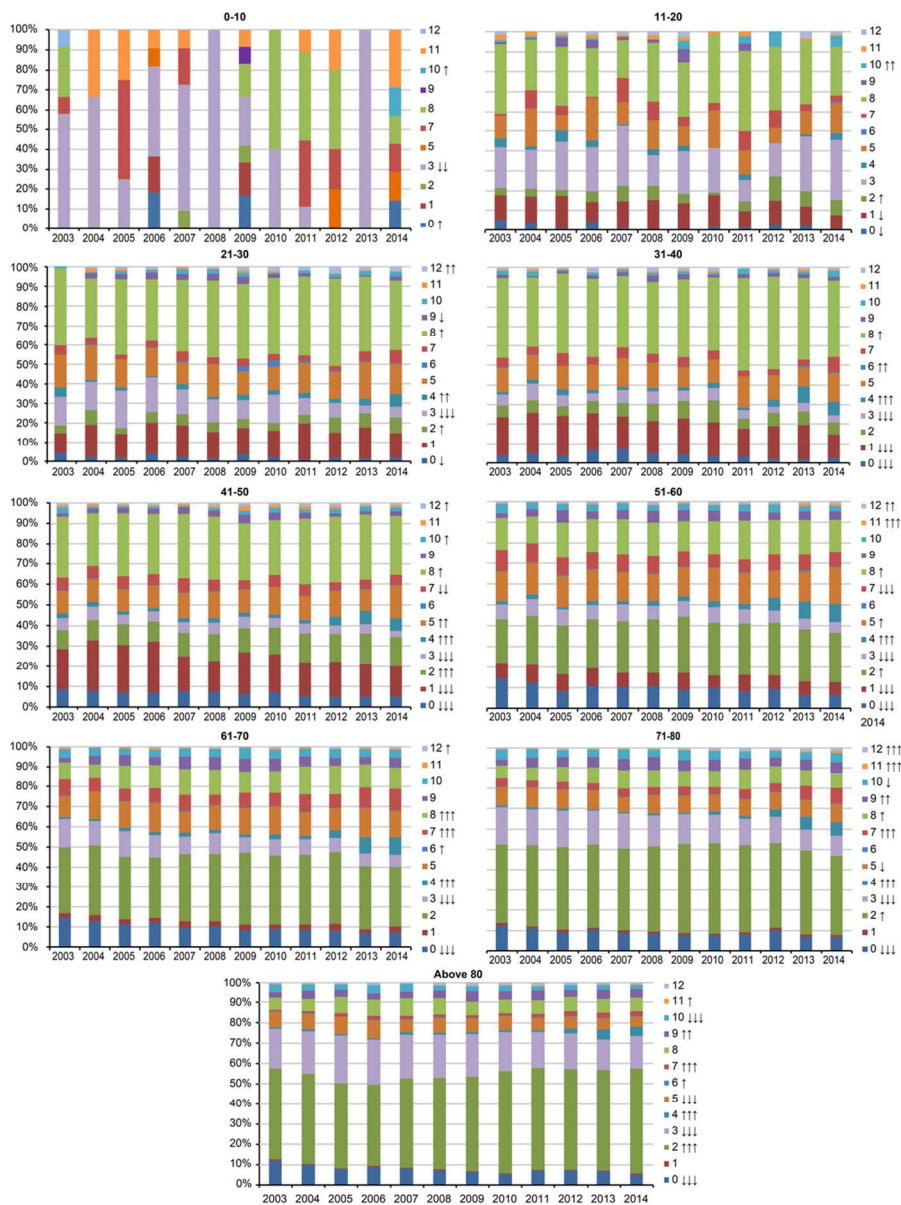

Fig. 2 Distribution of non-communicable diseases by age  
 0: cancer, 1: other neoplasms, 2: cardiovascular and circulatory diseases, 3: chronic respiratory diseases,  
 4: diabetes and blood and endocrine diseases, 5: digestive diseases, 6: mental and behavioural disorders,  
 7: musculoskeletal disorders, 8: urogenital diseases, 9: neurological disorders, 10: sensory organ diseases,  
 11: congenital anomalies, 12: skin and subcutaneous diseases  
 ↓: P<0.05,negative trend;↓↓: P<0.01, negative trend;↓↓↓: P<0.001,negative trend;  
 ↑: P<0.05,positive trend; ↑↑: P<0.01,positive trend;↑↑↑: P<0.001,positive trend.

48x64mm (600 x 600 DPI)

STROBE 2007 (v4) Statement—Checklist of items that should be included in reports of *cross-sectional studies*

| Section/Topic                | Item # | Recommendation                                                                                                                                                                       | Reported on page # |
|------------------------------|--------|--------------------------------------------------------------------------------------------------------------------------------------------------------------------------------------|--------------------|
| Title and abstract           | 1      | (a) Indicate the study's design with a commonly used term in the title or the abstract                                                                                               | 1                  |
|                              |        | (b) Provide in the abstract an informative and balanced summary of what was done and what was found                                                                                  | 2                  |
| <b>Introduction</b>          |        |                                                                                                                                                                                      |                    |
| Background/rationale         | 2      | Explain the scientific background and rationale for the investigation being reported                                                                                                 | 3-5                |
| Objectives                   | 3      | State specific objectives, including any prespecified hypotheses                                                                                                                     | 5                  |
| <b>Methods</b>               |        |                                                                                                                                                                                      |                    |
| Study design                 | 4      | Present key elements of study design early in the paper                                                                                                                              | 5-6                |
| Setting                      | 5      | Describe the setting, locations, and relevant dates, including periods of recruitment, exposure, follow-up, and data collection                                                      | 5-6                |
| Participants                 | 6      | (a) Give the eligibility criteria, and the sources and methods of selection of participants                                                                                          | 7                  |
| Variables                    | 7      | Clearly define all outcomes, exposures, predictors, potential confounders, and effect modifiers. Give diagnostic criteria, if applicable                                             | 7-8                |
| Data sources/<br>measurement | 8*     | For each variable of interest, give sources of data and details of methods of assessment (measurement). Describe comparability of assessment methods if there is more than one group | 7-8                |
| Bias                         | 9      | Describe any efforts to address potential sources of bias                                                                                                                            | 7                  |
| Study size                   | 10     | Explain how the study size was arrived at                                                                                                                                            | 5-6                |
| Quantitative variables       | 11     | Explain how quantitative variables were handled in the analyses. If applicable, describe which groupings were chosen and why                                                         | 7-8                |
| Statistical methods          | 12     | (a) Describe all statistical methods, including those used to control for confounding                                                                                                | 7-8                |
|                              |        | (b) Describe any methods used to examine subgroups and interactions                                                                                                                  | 7-8                |
|                              |        | (c) Explain how missing data were addressed                                                                                                                                          | 7-8                |
|                              |        | (d) If applicable, describe analytical methods taking account of sampling strategy                                                                                                   | 7-8                |
|                              |        | (e) Describe any sensitivity analyses                                                                                                                                                | 7-8                |
| <b>Results</b>               |        |                                                                                                                                                                                      |                    |

|                          |     |                                                                                                                                                                                                              |       |
|--------------------------|-----|--------------------------------------------------------------------------------------------------------------------------------------------------------------------------------------------------------------|-------|
| Participants             | 13* | (a) Report numbers of individuals at each stage of study—eg numbers potentially eligible, examined for eligibility, confirmed eligible, included in the study, completing follow-up, and analysed            | N/A   |
|                          |     | (b) Give reasons for non-participation at each stage                                                                                                                                                         | N/A   |
|                          |     | (c) Consider use of a flow diagram                                                                                                                                                                           | N/A   |
| Descriptive data         | 14* | (a) Give characteristics of study participants (eg demographic, clinical, social) and information on exposures and potential confounders                                                                     | 8     |
|                          |     | (b) Indicate number of participants with missing data for each variable of interest                                                                                                                          | N/A   |
| Outcome data             | 15* | Report numbers of outcome events or summary measures                                                                                                                                                         | 8-11  |
| Main results             | 16  | (a) Give unadjusted estimates and, if applicable, confounder-adjusted estimates and their precision (eg, 95% confidence interval). Make clear which confounders were adjusted for and why they were included | N/A   |
|                          |     | (b) Report category boundaries when continuous variables were categorized                                                                                                                                    | N/A   |
|                          |     | (c) If relevant, consider translating estimates of relative risk into absolute risk for a meaningful time period                                                                                             | N/A   |
| Other analyses           | 17  | Report other analyses done—eg analyses of subgroups and interactions, and sensitivity analyses                                                                                                               | N/A   |
| <b>Discussion</b>        |     |                                                                                                                                                                                                              |       |
| Key results              | 18  | Summarise key results with reference to study objectives                                                                                                                                                     | 11-12 |
| Limitations              | 19  | Discuss limitations of the study, taking into account sources of potential bias or imprecision. Discuss both direction and magnitude of any potential bias                                                   | 15    |
| Interpretation           | 20  | Give a cautious overall interpretation of results considering objectives, limitations, multiplicity of analyses, results from similar studies, and other relevant evidence                                   | 12-15 |
| Generalisability         | 21  | Discuss the generalisability (external validity) of the study results                                                                                                                                        | 15    |
| <b>Other information</b> |     |                                                                                                                                                                                                              |       |
| Funding                  | 22  | Give the source of funding and the role of the funders for the present study and, if applicable, for the original study on which the present article is based                                                | 16    |

\*Give information separately for cases and controls in case-control studies and, if applicable, for exposed and unexposed groups in cohort and cross-sectional studies.

**Note:** An Explanation and Elaboration article discusses each checklist item and gives methodological background and published examples of transparent reporting. The STROBE checklist is best used in conjunction with this article (freely available on the Web sites of PLoS Medicine at <http://www.plosmedicine.org/>, Annals of Internal Medicine at <http://www.annals.org/>, and Epidemiology at <http://www.epidem.com/>). Information on the STROBE Initiative is available at [www.strobe-statement.org](http://www.strobe-statement.org).

# BMJ Open

## Identifying the patterns of non-communicable diseases in developed eastern coastal China: A longitudinal study on the electronic health records in 12 public hospitals

|                                 |                                                                                                                                                                                                                                                                                                                                                                                                                                                                                                                                                                                                                                                                                                                                                                                                                                                                                                          |
|---------------------------------|----------------------------------------------------------------------------------------------------------------------------------------------------------------------------------------------------------------------------------------------------------------------------------------------------------------------------------------------------------------------------------------------------------------------------------------------------------------------------------------------------------------------------------------------------------------------------------------------------------------------------------------------------------------------------------------------------------------------------------------------------------------------------------------------------------------------------------------------------------------------------------------------------------|
| Journal:                        | <i>BMJ Open</i>                                                                                                                                                                                                                                                                                                                                                                                                                                                                                                                                                                                                                                                                                                                                                                                                                                                                                          |
| Manuscript ID                   | bmjopen-2017-016007.R1                                                                                                                                                                                                                                                                                                                                                                                                                                                                                                                                                                                                                                                                                                                                                                                                                                                                                   |
| Article Type:                   | Research                                                                                                                                                                                                                                                                                                                                                                                                                                                                                                                                                                                                                                                                                                                                                                                                                                                                                                 |
| Date Submitted by the Author:   | 12-Apr-2017                                                                                                                                                                                                                                                                                                                                                                                                                                                                                                                                                                                                                                                                                                                                                                                                                                                                                              |
| Complete List of Authors:       | Yu, Dehua; Yangpu Hospital, Tongji University School of Medicine, Department of General Medicine<br>Shi, Jianwei; Tongji University School of Medicine; Yangpu Hospital, Tongji University School of Medicine<br>Zhang, Hanzhi; Yangpu Hospital, Tongji University School of Medicine, Department of General Medicine<br>Wang, Zhaoxin; Tongji University School of Medicine; Yangpu Hospital, Tongji University School of Medicine, Department of General Medicine<br>Lu, Yuan; Yangpu Hospital, Tongji University School of Medicine, Department of General Medicine<br>Zhang, Bin; Yangpu Hospital, Tongji University School of Medicine, Department of General Medicine<br>Pan, Ying; Yangpu Hospital, Tongji University School of Medicine<br>Wang, Bo; Yangpu Hospital, Tongji University School of Medicine, Department of General Medicine<br>Sun, Pengfei; Tongji University School of Medicine |
| <b>Primary Subject Heading</b>: | Health services research                                                                                                                                                                                                                                                                                                                                                                                                                                                                                                                                                                                                                                                                                                                                                                                                                                                                                 |
| Secondary Subject Heading:      | Evidence based practice, Global health, Health services research, Public health                                                                                                                                                                                                                                                                                                                                                                                                                                                                                                                                                                                                                                                                                                                                                                                                                          |
| Keywords:                       | Non-communicable diseases, Electronic Health Record, Eastern coastal China, Health policy < HEALTH SERVICES ADMINISTRATION & MANAGEMENT                                                                                                                                                                                                                                                                                                                                                                                                                                                                                                                                                                                                                                                                                                                                                                  |
|                                 |                                                                                                                                                                                                                                                                                                                                                                                                                                                                                                                                                                                                                                                                                                                                                                                                                                                                                                          |

SCHOLARONE™  
Manuscripts

1  
2  
3  
4 1 **Identifying the patterns of non-communicable diseases in**  
5  
6 2 **developed eastern coastal China: A longitudinal study on the**  
7  
8  
9 3 **electronic health records in 12 public hospitals**

4 Dehua Yu, PhD<sup>1#</sup>, Jianwei Shi, PhD<sup>12#</sup>, Hanzhi Zhang, MD<sup>1</sup>, Zhaoxin Wang, PhD<sup>12\*</sup>,  
5 Yuan Lu, MD<sup>1</sup>, Bin Zhang, MD<sup>1</sup>, Ying Pan, MD<sup>1</sup>, Bo Wang, PhD<sup>1</sup>, Pengfei Sun, BD<sup>2</sup>

6 *1 Department of General Medicine, Yangpu Hospital, Tongji University School of*  
7 *Medicine, Shanghai, 200090, China*

8 *2 Tongji University School of Medicine, Shanghai, 200092, China*

9  
10 DehuaYu: ydn1404@sina.com

11 JianweiShi: shijianwei\_amy@126.com

12 Hanzhi Zhang: drchan001@163.com

13 Zhaoxin Wang: supercell002@sina.com

14 Yuan Lu: lussy@126.com

15 Bin Zhang: metamophore@aliyun.com

16 Ying Pan: hshpanying@163.com

17 Bo Wang: bowang13241@163.com

18 Pengfei Sun: 18817599414@163.com

19  
20 # These authors are co-first authors on this paper.

21 **\*Corresponding author:**

22 **Zhaoxin Wang,**

23 Associate Professor, PhD

24 School of Medicine

25 Tongji University

26 Address: 1239 Si Ping RD, Yangpu District, Shanghai, 200092, China

27 Email: supercell002@sina.com

28 Tel: 86-13918537473



---

1  
2  
3  
4  
5  
6  
7  
8  
9  
10  
11  
12

# 29 Identifying the patterns of non-communicable 30 diseases in developed eastern coastal China: A 31 longitudinal study on the electronic health records in 32 12 public hospitals

13 Dehua Yu, PhD<sup>1#</sup>, Jianwei Shi, PhD<sup>1,2#</sup>, Hanzhi Zhang, MD<sup>1</sup>, Zhaoxin Wang, PhD<sup>1,2\*</sup>,

14 Yuan Lu, MD<sup>1</sup>, Bin Zhang, MD<sup>1</sup>, Ying Pan, MD<sup>1</sup>, Bo Wang, PhD<sup>1</sup>, Pengfei Sun, BD<sup>2</sup>

15  
16  
17 *1 Department of General Medicine, Yangpu Hospital, Tongji University School of*  
18 *Medicine, Shanghai, 200090, China*

19  
20  
21 *2 Tongji University School of Medicine, Shanghai, 200092, China*

22  
23  
24 #: Dehua Yu and Jianwei Shi are co-first authors on this paper

25  
26  
27 \* Corresponding author: Zhaoxin Wang, Email: supercell002@sina.com

## 30 ABSTRACT

31  
32  
33 **Objective:** Few studies have examined the spectrum and trends of non-communicable  
34 diseases (NCDs) in inpatients in eastern coastal China, which is transforming from an  
35 industrial economy to a service-oriented economy and is the most economically  
36 developed region in the country. The aim of this study was to dynamically elucidate  
37 the spectrum and characteristics of severe NCDs in eastern coastal China by analysing  
38 patients' longitudinal electronic health records (EHRs).

39  
40  
41 **Setting:** To monitor the spectrum of NCDs dynamically, we extracted the EHR data  
42 from 12 general tertiary hospitals in eastern coastal China from 2003 to 2014. The  
43 rankings of and trends in the proportions of different NCDs presented by inpatients in  
44 different gender and age groups were calculated and analysed.

1  
2  
3  
4 51 **Participants:** We obtained a total sample of 1,907,484 inpatients with NCDs from  
5  
6 52 2003 to 2014, 50.05% of whom were male and the majority of whom were aged 50  
7  
8 53 years or older (81.53%).

9  
10  
11 54 **Results:** There is an increase in the number of total NCD inpatients in eastern coastal  
12  
13  
14 55 China from 2003 to 2014. However, the proportion of chronic respiratory diseases and  
15  
16  
17 56 cancer inpatients decreased over the 12-year period. Compared with men, women  
18  
19  
20 57 displayed higher proportions of digestive diseases ( $P=0.394$ ) and neurological  
21  
22 58 disorders ( $P=0.173$ ) over time. The older group accounted for a larger and growing  
23  
24 59 proportion of the NCD inpatients, and the most common conditions in this group were  
25  
26  
27 60 cerebral infarctions, coronary heart disease and hypertension. In addition, the  
28  
29  
30 61 proportion of 21- to 50-year-old inpatients with diabetes, blood diseases or endocrine  
31  
32 62 diseases skyrocketed from 2003 to 2014 ( $P<0.001$ ).

33  
34  
35 63 **Conclusions:** The burden of inpatients' NCDs increased rapidly, particularly among  
36  
37  
38 64 women and younger people. The NCD spectrum observed in eastern coastal China is  
39  
40  
41 65 a good source of evidence for developing prevention guides for regions experiencing  
42  
43 66 transition.

44  
45 67 **Keywords:** Non-communicable diseases; Electronic Health Record; Eastern coastal  
46  
47  
48 68 China; Health policy

49  
50  
51 69 **Strengths and limitations**

52  
53 70 ● The concept of using longitudinal EHRs to document the proportion of NCD  
54  
55  
56 71 admissions in eastern coastal China hospitals can provide a reasonably simple and  
57  
58  
59  
60

- 1  
2  
3  
4 72 precise method of examining NCD trends over time.  
5  
6 73 ● The evidence is a good source to develop NCD prevention guides or policies for  
7  
8 74 similar developing regions that are undergoing or will undergo an economic  
9  
10 75 transformation.  
11  
12 76 ● The generalisability and reliability of the findings of this study are a concern, and  
13  
14 77 more hospitals from other parts of China should be included in future studies to  
15  
16 78 make a persuasive comparison.  
17  
18  
19  
20  
21  
22  
23

## 24 INTRODUCTION

25  
26  
27 81 In recent years, an epidemiological shift in morbidity and mortality from infectious  
28  
29 82 diseases and malnutrition to non-communicable diseases(NCDs) has occurred in  
30  
31 83 many countries, including China[1-3]. NCDs have become the major causes of death  
32  
33 84 in China and globally. According to the 2012 WHO data repository, 87% of deaths in  
34  
35 85 China were associated with NCDs[1]. The Global Burden of Disease Study(GBD)  
36  
37 86 revealed that of the 8.3 million deaths in China in 2010, 7.0 million resulted from  
38  
39 87 NCDs[3]. Stroke, ischaemic heart disease, cancers, and chronic obstructive  
40  
41 88 pulmonary disease are now the leading causes of premature death in China, and the  
42  
43 89 burden of these diseases is substantial[4].  
44  
45  
46  
47  
48  
49

50 90 Previous research on the epidemiological patterns of NCDs in China has primarily  
51  
52 91 focused on the entire nation or cross-sectional studies of specific regions[1-6].  
53  
54 92 However, both the WHO and the GBD have acknowledged that a national analysis  
55  
56 93 conducted in a country as large and diverse as China can mask substantial variations  
57  
58  
59  
60

---

1  
2  
3  
4 94 in key outcomes[3,5]. In addition, few studies have examined the NCD spectrum in  
5  
6 95 inpatients, which can reflect the severe state of NCDs. In this study, we conducted a  
7  
8  
9 96 longitudinal study of NCD patterns in five provinces in eastern coastal China:  
10  
11 97 Shandong, Jiangsu, Zhejiang, Shanghai and Guangdong provinces. Geographically  
12  
13  
14 98 speaking, these provinces are located in the three most productive and dynamic  
15  
16 99 regions of China: the Bohai Sea, the Yangtze River Delta and the Pearl River Delta.  
17  
18  
19 100 The gross regional domestic product in these five provinces accounts for  
20  
21 101 approximately half that of the 32 provinces/autonomous regions/municipalities in  
22  
23  
24 102 China. These provinces' gross domestic product(GDP) per capita far exceeded the  
25  
26 103 average value in China from 2005 to 2014[7] and was similar to the GDP of other  
27  
28  
29 104 developed countries in Asia. Moreover, since the 2000s, this region has experienced  
30  
31 105 dramatic changes in both the economic and health sectors[8]. According to the Health  
32  
33  
34 106 Statistics Yearbook, in 2015, the average life expectancy in eastern coastal China was  
35  
36 107 around 78 years old, which is greater than the national average of approximately 76  
37  
38  
39 108 years old[7]. Due to the rapid urbanisation, economic development and population  
40  
41 109 ageing in eastern coastal China, NCDs and disabilities are becoming more  
42  
43  
44 110 prevalent[1,3], and the spectrum of inpatients' diseases in this area is speculated to  
45  
46 111 largely differ from that in other regions of China. More specific guidelines for  
47  
48  
49 112 preventing and curing NCDs that are tailored to the disease patterns observed in  
50  
51  
52 113 eastern coastal China must be developed.

53  
54  
55 114 In exploring disease patterns, particularly in longitudinal studies based on a large  
56  
57 115 sample, second-hand data may be regarded as a good source. In particular, data from  
58  
59  
60

1  
2  
3  
4 116 hospitals' electronic health record(EHR) systems have unique advantages. For  
5  
6 117 instance, Upshur et al. applied time series methods to a population-based retrospective  
7  
8  
9 118 cohort for the 52 most common causes of hospital admissions in the province of  
10  
11 119 Ontario from 1988 to 2001 and showed that hospital admissions displayed systematic  
12  
13  
14 120 patterns that are understandable, predictable, and reasonably accurate[9]. Using data  
15  
16 121 from the admission and discharge/death register, Sani et al.[10] conducted a  
17  
18  
19 122 three-year review of mortality patterns. Their result supported the emerging trend of a  
20  
21 123 combined burden of communicable diseases and NCDs. In China, disease surveillance  
22  
23  
24 124 is conducted by the National Disease Surveillance Points System, which was founded  
25  
26 125 in 1978; however, this system reports primarily on communicable diseases and reports  
27  
28  
29 126 on only a small subset of NCDs, such as cancer[11,12]. Given these factors, the  
30  
31 127 current study used the hospital-based EHR system as a data source. This relatively  
32  
33  
34 128 new database compiles clinical information from a large number of patients in a  
35  
36 129 computationally accessible form. The EHR system provides us with a unique  
37  
38  
39 130 opportunity to elucidate the relatively severe NCD epidemiology and includes a  
40  
41 131 diverse array of NCDs[13].

42  
43  
44 132 The aim of this study was to dynamically elucidate the spectrum and characteristics of  
45  
46 133 severe NCDs in eastern coastal China by analysing hospitals' longitudinal EHR data.

47  
48  
49 134 The results can provide insight into the aetiology of NCDs and aid in the development  
50  
51 135 of evidence-based clinical guidelines for preventing and curing NCDs. In addition, the  
52  
53  
54 136 distribution of NCDs in eastern coastal China can inform the development of clinical  
55  
56  
57 137 guidelines for NCDs in other regions or countries in transition.  
58  
59  
60

---

## 138 **METHODS**

### 139 **Study design and data collection**

140 Longitudinal data(2003-2014) on NCDs were extracted from the EHR systems of 12  
141 general tertiary hospitals in Shandong(2 hospitals), Jiangsu(2 hospitals), Zhejiang(2  
142 hospitals), Shanghai(3 hospitals) and Guangdong Provinces(3 hospitals).

143 A multistage sample was obtained. To obtain a representative sample, when choosing  
144 the sites, we first selected 3 cities that represented high, middle, and low  
145 socioeconomic statuses, as defined by GDP level, in each of the 5 provinces. Second,  
146 in each city, we selected the largest general tertiary hospital, resulting in 15 sampled  
147 hospitals. However, we did not obtain consent from three tertiary hospitals in some  
148 cities in Shandong, Jiangsu and Zhejiang Provinces due to political reasons regarding  
149 EHR data collection. In China, EHR data are not openly available but can be obtained  
150 from consenting hospitals with the help of health authorities. However, for several  
151 reasons, the health authorities cannot support us in the future. Thus, 12 general  
152 tertiary hospitals were included in the study. In this study, one hospital in Shandong  
153 Province in the low socioeconomic group, one hospital in Jiangsu Province in the  
154 middle socioeconomic group, and one hospital in Zhejiang Province in the high group  
155 were missing from the dataset. However, due to the distribution of the missing  
156 hospitals, it was thought that lack of participation of these hospitals would not  
157 influence the final results. In China, EHRs have used a uniform version since 2001 in  
158 most large cities and comprised two parts. The first part contains the patients' personal

1  
2  
3  
4 159 information, including their gender, age, identification card number, profession,  
5  
6 160 address, etc. This information is usually provided by the patients or their family. The  
7  
8  
9 161 second part contains the inpatients' hospitalisation information, including their  
10  
11 162 diagnosis code, discharge status, pathologic diagnosis (if possible), operation code (if  
12  
13  
14 163 possible), etc. This information is provided by the patient's physician, which ensures  
15  
16 164 its reliability. In terms of the diagnosis code, each inpatient is coded with an ICD-9  
17  
18 165 disease code by their physician. In addition, the GBD has well defined categories for  
19  
20  
21 166 NCDs. Therefore, we extracted the inpatients' NCDs using their ICD-9 codes and  
22  
23  
24 167 classified them into different categories.

25  
26  
27 168 We selected tertiary hospitals for this study. In China, hospitals are classified into  
28  
29  
30 169 three categories according to their major functions. Although community institutions  
31  
32  
33 170 are intended to serve as gatekeepers, a patient's freedom to select medical facilities  
34  
35 171 and doctors is not restricted by policies or health insurance coverage. Consequently,  
36  
37  
38 172 patients with acute or chronic diseases frequently visit the higher-tier, more  
39  
40 173 sophisticated or specialised, and more expensive hospitals rather than community  
41  
42 174 health centres, and many of the community health centres do not have hospital beds.  
43  
44  
45 175 In addition, their EHR systems are defective and incomplete, limiting the use of the  
46  
47  
48 176 information they contain[14]. Typically, the largest tertiary hospitals see most of the  
49  
50 177 patients discharged in their cities.

## 51 52 53 178 **Study subjects**

54  
55  
56  
57 179 In this study, information on inpatients with NCDs was extracted from the 2003-2014  
58  
59  
60

---

1  
2  
3  
4 180 hospital EHR data of each hospital, and only individuals who had been admitted to  
5  
6 181 these hospitals during this period were included. We chose 2003 as the starting point  
7  
8  
9 182 because the first EHR system was formally launched in these hospitals in that year. In  
10  
11 183 our study, the EHR systems of the tertiary hospitals include the admission information  
12  
13 184 of patients who received their first diagnosis of an NCD between 2003 and 2014. We  
14  
15 185 excluded any duplicated patients by searching and analysing their Identification Card  
16  
17  
18 186 number in the EHRs. In addition, because these hospitals may also attract patients  
19  
20  
21 187 from other districts or provinces, the inclusion criteria stipulated that participants must  
22  
23 188 have a fixed address in the relevant region, regardless of whether they were registered  
24  
25  
26 189 or nonregistered residents. After excluding non-residents, NCD information for a total  
27  
28  
29 190 of 1,907,484 inpatients was stripped of identifying information and extracted from the  
30  
31 191 hospitals' EHR systems. These patients were admitted to a variety of hospital  
32  
33 192 divisions, and according to the ICD-9 and GBD NCD classification, we extracted the  
34  
35 193 NCD patients from all of the inpatients and classified them into various disease  
36  
37  
38 194 groups based on their first-list diagnosis. The final data set included the residents'  
39  
40  
41 195 basic demographic information(gender and age) and the presence of chronic  
42  
43 196 diseases(disease system/category, disorder and year of admission). We did not include  
44  
45  
46 197 region and socioeconomic status as factors because all of the hospitals were located in  
47  
48  
49 198 an urban region and because it is difficult to determine the inpatients' socioeconomic  
50  
51  
52 199 status from the EHR.

## 200 **Statistical analysis**

201 All data were analysed by using SAS Software 9.20. Basic descriptive statistics were



1  
2  
3  
4 202 used to analyse the inpatients' personal characteristics(gender, age, and year of  
5  
6 203 admission). The NCD systems and the most common disorders within each disease  
7  
8 204 system were ranked according to their relative proportions. The Cochran-Armitage  
9  
10 205 Chi-square test was then used to examine significant increases or decreases in the  
11  
12 206 proportions of NCDs in disease systems across different gender and age groups  
13  
14 207 between 2003 and 2014.  
15  
16  
17  
18

#### 19 208 **Ethics statement**

20 209 All research activities were conducted with integrity according to generally accepted  
21  
22 210 ethical principles and were approved by the Ethics Committees of Tongji  
23  
24 211 University(ref: LL-2016-ZRKX-017). This study presented minimal risk of harm to  
25  
26 212 its subjects, and the data were collected anonymously. None of the inpatients'  
27  
28 213 personal information included in the database was available to individuals outside of  
29  
30 214 the research team.  
31  
32  
33  
34  
35  
36  
37  
38

## 39 215 **RESULTS**

### 40 216 **Description of the personal characteristics of inpatients with NCDs**

41  
42 217 The personal characteristics of the studied population are summarised in Table 1. This  
43  
44 218 population included 1,907,484 inpatients with NCDs, 50.05% of whom were male.  
45  
46 219 Most of these patients were aged 50 years or older(81.53%). Furthermore, the number  
47  
48 220 of inpatients with NCDs increased from 2003 to 2014.  
49  
50  
51  
52  
53  
54

### 55 221 **Ranking of the disorders in all NCDs categories within gender and age groups**

1  
2  
3  
4 222 The ranks and proportions of all NCDs for each gender group are presented in Table 2.  
5  
6 223 Among males, each of the five most common disorders represented more than 4.0%  
7  
8 224 of the total NCDs from 2003 to 2014. The three most frequently occurring disorders  
9  
10 225 among men inpatients were cerebral infarction(12.61%), coronary heart  
11  
12 226 disease(6.94%) and hypertension(6.05%). Similarly, those for women showed that  
13  
14 227 cerebral infarction(9.63%) occurred most frequently. However, hypertension(6.84%)  
15  
16 228 and uterine fibroids(4.15%) were the second and third most frequently occurring  
17  
18 229 NCDs among women, respectively.  
19  
20  
21  
22  
23

24 230 Table 2 also shows the ranks of the most frequently occurring disorders across age  
25  
26 231 groups. The older group(>41 years of age) accounted for a larger proportion of NCD  
27  
28 232 inpatients, and the most common conditions in this group were cerebral infarction,  
29  
30 233 coronary heart disease and hypertension. In the 11- to 50-year-old group, urogenital  
31  
32 234 diseases, endocrine diseases and neoplasms including redundant prepuce, benign  
33  
34 235 neoplasm of the breast and endometrial hyperplasia occurred frequently in men and  
35  
36 236 women. In addition, hypertension, chronic obstructive pulmonary disease and diabetes  
37  
38 237 were more common among the elderly than among individuals in the other age  
39  
40 238 groups.  
41  
42  
43  
44  
45  
46  
47

#### 48 239 **Distribution of NCDs across the different groups from 2003 to 2014**

49  
50 240 Table 3 shows the changes in the proportions of the 12 NCD categories from 2003 to  
51  
52 241 2014. A significant decrease in the occurrence of cancer( $Z=-20.525$ ,  $P<0.001$ ), other  
53  
54 242 neoplasms( $Z=-20.525$ ,  $P<0.001$ ), chronic respiratory diseases( $Z=-18.290$ ,  $P<0.001$ ),  
55  
56  
57  
58  
59  
60

1  
2  
3  
4 243 urogenital diseases( $Z=-5.329$ ,  $P<0.001$ ) and sensory organ diseases( $Z=-2.403$ ,  
5  
6 244  $P=0.008$ ) was found. In contrast, the proportions of other NCDs increased to various  
7  
8 245 extents over the 12-year period. Notably, the proportion of patients with diabetes and  
9  
10 246 blood and endocrine diseases increased approximately four-fold(from 1.36% to  
11  
12 247 6.74%).

13  
14  
15  
16  
17 248 As shown in Figure 1, the 12-year NCD percentages recorded in the hospitals varied  
18  
19 249 widely by gender. The percentage of both men and women who were diagnosed with  
20  
21 250 diabetes or blood and endocrine diseases increased substantially. It is worth noting  
22  
23 251 that the percentage of women who were diagnosed with digestive diseases( $Z=-0.270$ ,  
24  
25 252  $P=0.394$ ), neurological disorders( $Z=0.943$ ,  $P=0.173$ ), and sensory organ diseases  
26  
27 253 ( $Z=0.056$ ,  $P=0.478$ ) was higher and found in more stable proportions from 2003 to  
28  
29 254 2014; this result is in strong contrast to the pattern found in the male inpatients. In  
30  
31 255 addition, although the proportion of cancer and other neoplasms decreased in women,  
32  
33 256 this decrease was less pronounced than that found in men.

34  
35  
36  
37  
38  
39 257 Changes in NCDs proportions across age groups were also examined(Figure 2).  
40  
41 258 NCDs were relatively rare among patients aged 10 years or younger, but chronic  
42  
43 259 respiratory diseases occurred most frequently in this group. For 11-20-year-old  
44  
45 260 subjects, sensory organ diseases( $Z=3.304$ ,  $P<0.001$ ) and cardiovascular and  
46  
47 261 circulatory diseases( $Z=2.090$ ,  $P=0.018$ ) occurred more frequently over time. We  
48  
49 262 noted the proportions of patients with diabetes or blood and endocrine diseases  
50  
51 263 increased in these two groups and in the below 30-year-old group. For the 41- to  
52  
53 264 50-year-old group, the number of patients diagnosed with cancer decreased  
54  
55  
56  
57  
58  
59  
60

1  
2  
3  
4 265 significantly but the proportions of patients with cardiovascular, circulatory( $Z=7.918$ ,  
5  
6 266  $P<0.001$ ) and digestive diseases ( $Z=3.086$ ,  $P<0.01$ ) increased to a greater extent than  
7  
8  
9 267 in the younger population. In the  $\geq 50$ -year-old group, the proportion of patients with  
10  
11 268 diabetes or blood and endocrine diseases increased substantially( $P<0.001$ ).

## 15 269 **DISCUSSION**

17 270 By analysing the EHR information of inpatients with NCDs at 12 hospitals in eastern  
18  
19  
20 271 coastal China, our research team was able to elucidate the severe NCD patterns in a  
21  
22 272 relatively unbiased fashion and to confirm that NCDs displayed regional  
23  
24  
25 273 heterogeneity to some extent. The increase in the number of NCD inpatients in eastern  
26  
27  
28 274 coastal China from 2003 to 2014 may be due to several reasons. First, owing to  
29  
30 275 improvements in economics, health insurance and convenient transportation in China,  
31  
32 276 even people with minor diseases may go to larger hospitals because they are equipped  
33  
34  
35 277 with better devices and doctors and do not adhere to strict referral policies. Second,  
36  
37 278 the increase in the number of severe NCD patients may mainly result from higher  
38  
39  
40 279 pressure, a lack of exercise, and air pollution, among other factors in rapidly  
41  
42 280 developed cities[14,15], which is consistent with the findings of Allen et al.(2017)  
43  
44  
45 281 who, in a systematic review, showed that NCD behavioural risk factors is well  
46  
47 282 established in high-income countries. For example, high socioeconomic groups were  
48  
49  
50 283 found to be less physically active and to consume more fats, salt, and processed food  
51  
52  
53 284 than low socioeconomic status individuals[16].

55  
56 285 In order of ranks, cardiovascular and circulatory diseases, urogenital diseases, chronic  
57  
58  
59  
60

1  
2  
3  
4 286 respiratory diseases, and digestive diseases were the most common NCDs in this  
5  
6 287 region. In eastern coastal China, severe cardiovascular and circulatory diseases may  
7  
8  
9 288 occur more frequently because of the greater degree of urbanisation and greater  
10  
11 289 proportion of ageing population in the region[2,3]. Goryakin et al.(2017) studied the  
12  
13 290 contribution of urbanisation to NCDs in 173 countries and found that when shifting  
14  
15 291 from rural to urban areas, the average body mass index (BMI), total cholesterol level  
16  
17 292 and systolic blood pressure, increased[17], demonstrating that high urbanisation  
18  
19 293 increases the occurrence of cardiovascular and circulatory diseases, which is in  
20  
21 294 consistent with this study. In addition, the frequency of urogenital diseases (second)  
22  
23 295 and digestive diseases (fourth) in this region is potentially because of the more rapid  
24  
25 296 pace of modern life, more sedentary lifestyle and longer working hours. In our search  
26  
27 297 of existing studies on inpatients with NCDs, we rarely found this spectrum at the top  
28  
29 298 of the list in other regions[18]. However, interestingly, this study revealed that the  
30  
31 299 proportion of chronic respiratory diseases and cancer inpatients decreased over the  
32  
33 300 12-year period, in stark contrast to the changes in the incidence observed throughout  
34  
35 301 China[19,20]. Often, previous studies have concluded that the incidence of respiratory  
36  
37 302 diseases is increasing, likely due to ambient air pollution and tobacco use, resulting in  
38  
39 303 tremendous threats to respiratory health[3,21]. This difference may be a result of the  
40  
41 304 data because the reported incidence also includes mild respiratory diseases. However,  
42  
43 305 the opposite trend found in inpatients in eastern coastal China may have also resulted  
44  
45 306 from this region's transition from a heavy industrial district to a technologically  
46  
47 307 focused area, which has been associated with a substantial reduction in environmental  
48  
49  
50  
51  
52  
53  
54  
55  
56  
57  
58  
59  
60

1  
2  
3  
4 308 pollution. Moreover, the regional public health media campaigns have focused on  
5  
6 309 cancer prevention and the regional government has promoted early screening and the  
7  
8  
9 310 treatment of major cancers since the 2000s, particularly in these developed areas in  
10  
11 311 China where the government can invest more money into public health activities[22],  
12  
13  
14 312 which likely explains the reduced proportion of cancer patients. However, PM 2.5 air  
15  
16 313 pollution, household pollution, tobacco use, residents' insufficient knowledge of NCD  
17  
18 314 prevention, etc. remain persistent risk factors in eastern coastal China and deserve  
19  
20  
21 315 considerable attention[23,24].  
22  
23

24 316 Concerning the NCD distribution in the different age groups, we found that the older  
25  
26  
27 317 age group accounted for the largest proportion of individuals with NCDs, with  
28  
29 318 cerebral infarction, coronary heart disease and hypertension being the most common  
30  
31 319 conditions, which is consistent with the epidemiological features of NCDs[25,26] and  
32  
33  
34 320 indicates these NCDs represent a significant burden for the Chinese government.  
35  
36  
37 321 Interestingly, it is also found that not only did the proportion of older patients  
38  
39 322 suffering from NCDs such as diabetes or blood and endocrine diseases increase nearly  
40  
41  
42 323 four-fold from 2003 to 2014, but also, the proportion of younger individuals between  
43  
44 324 the ages of 30 and 50 with these diseases increased significantly. However, this may  
45  
46  
47 325 be the result of unhealthy nutrient intake and great psychological pressure on the  
48  
49  
50 326 younger population in this fast-paced area and should be given great attention.  
51

52  
53 327 Additionally, the identified demographic differences in which women exhibit a higher  
54  
55 328 proportion of severe digestive diseases and neurological disorders may indicate that  
56  
57  
58 329 currently, women in China are employed in the same fast-paced jobs or roles as  
59  
60

1  
2  
3  
4 330 men[27]. Furthermore, women are expected to devote more effort to balancing family  
5  
6 331 and work[28,29] in developed areas or cities, which is undoubtedly challenging for  
7  
8  
9 332 them and may induce the onset of these diseases. These factors imply that specific  
10  
11 333 risk factors for frequently occurring NCDs in different gender groups should be  
12  
13  
14 334 monitored in addition to the diseases or groups that are currently monitored and  
15  
16 335 screened for due to their significant burden. Other frequently occurring NCD diseases  
17  
18  
19 336 and a wider population should also be targeted, such as the prevention and screening  
20  
21 337 of digestive diseases in females or increased preventative measures for diabetes and  
22  
23  
24 338 blood, endocrine, cardiovascular and circulatory diseases among the younger and  
25  
26 339 population. In addition, all these call for the improvement and more invest in  
27  
28  
29 340 prevention and control of NCDs by community health institutions, which is lagged  
30  
31 341 even in the economic-developed eastern coastal or averagely the whole China  
32  
33  
34 342 compared with the western countries[30]. For instance, usually community health  
35  
36 343 institutions are competing with hospitals to attract more patients, and only the public  
37  
38  
39 344 health physicians(different from general physicians) mainly take the responsibilities  
40  
41 345 of health education and follow-up visit for NCD patients. According to a survey on a  
42  
43  
44 346 representative community health institution in Shanghai, the public health physicians  
45  
46 347 accounted for 7.94% of the total health personnel, which are in great shortage.  
47  
48  
49 348 Undoubtedly, this is a significant political and public issue for China currently to better  
50  
51 349 reduce the NCDs and improve the national health[31].  
52

### 53 54 350 **Limitations**

55  
56  
57  
58 351 In this study, there were several limitations. First, the sampled hospitals were the  
59  
60

1  
2  
3  
4 352 largest hospitals in eastern coastal cities. These cities were selected to increase the  
5  
6 353 sample's representativeness of eastern coastal China. However, the generalisability  
7  
8  
9 354 and reliability of the findings are a concern. Because the EHR included a large  
10  
11 355 number of inpatients with NCDs, it was a precise data source for determining the  
12  
13  
14 356 status of and trends in the occurrence of different diseases. To reduce selection bias,  
15  
16 357 more representative hospitals from each of the cities must be investigated. Second,  
17  
18  
19 358 because socioeconomic data was absent in the EHRs, we were unable to compare the  
20  
21 359 differences in socioeconomic groups in this study. Third, because few longitudinal  
22  
23  
24 360 studies examining the spectrum of NCDs among many hospitals' inpatients have been  
25  
26 361 conducted in other areas of China, it was difficult to compare the current findings  
27  
28  
29 362 regarding inpatients' NCDs with those in other parts of China.

## 363 **CONCLUSIONS**

364 In summary, the spectrum of NCD inpatients from 12 hospitals exhibits the severe  
365 NCDs condition and spectrum in eastern coastal China to a certain extent. Specific  
366 NCDs rapidly increased in women and the younger population over the studied  
367 12-year period, underscoring the importance of healthcare policies or guidelines for  
368 developing countries or regions such as China. However, due to the limited  
369 generalisability and reliability of this study, stronger support must be obtained  
370 through future studies on the spectrum of inpatients' NCDs in eastern coastal China  
371 and other regions.

## 372 **Abbreviations**

373 Non-communicable diseases: NCDs



1  
2  
3  
4 374 GDP: Gross domestic product  
5  
6

7  
8 375 **Acknowledgements**  
9

10 376 The authors appreciate the assistance of all the hospitals involved in this research  
11  
12 377 project in collecting the data.  
13

14  
15 378 **Funding**  
16

17 379 The design of this study was financially supported by the Shanghai Health Policy  
18  
19 380 Program(2016HP043). Data collection, analysis and interpretation were funded as  
20  
21 381 part of a Central University Special Funds for Scientific Research  
22  
23 382 Project(1500219099), and the writing and revision of the manuscript was funded by  
24  
25 383 the National Natural Science Foundation of China (71603182) and the Shanghai  
26  
27 384 Health Bureau Program(201440344).  
28  
29  
30  
31

32 385 **Availability of data and materials**  
33

34  
35 386 All relevant data are available in the Figshare database under the DOI:

36  
37 387 <https://figshare.com/s/f79b2b4e686d1d477527>  
38  
39

40 388 **Authors' contributions**  
41

42 389 Conceived and designed the experiments: DHY, JWS and ZXW. Analysed the data:  
43  
44 390 JWS, HZZ and YL. Contributed reagents/materials/analysis tools: YL, BZ, YP, BW  
45  
46 391 and PFS. Wrote the paper: DHY and JWS.  
47  
48  
49

50 392 **Competing interests**  
51

52 393 The authors have declared that they have no competing interests.  
53  
54

55  
56 394  
57  
58  
59  
60

---

## REFERENCES

- 395  
396 1 World Health Organization. Non communicable diseases progress. *Monitor*.  
397 [http://apps.who.int/iris/bitstream/10665/184688/1/9789241509459\\_eng.pdf](http://apps.who.int/iris/bitstream/10665/184688/1/9789241509459_eng.pdf)  
398 (accessed: 1 Apr 2016), 2015.
- 399 2 Lim SS, Vos T, Flaxman AD, et al. A comparative risk assessment of burden  
400 of disease and injury attributable to 67 risk factors and risk factor clusters in  
401 21 regions, 1990-2010: a systematic analysis for the global Burden of Disease  
402 Study 2010. *Lancet*2012;380:2224-60. doi:10.1016/S0140-6736(12)61766-8.
- 403 3 Yang G, Wang Y, Zeng Y, et al. Rapid health transition in China, 1990-2010:  
404 findings from the Global Burden of Disease Study 2010.  
405 *Lancet*2013;381:1987-2015. doi:10.1016/S0140-6736(13)61097-1.
- 406 4 Liu Y, Yang G, Zeng Y, et al. Policy dialogue on China's changing burden of  
407 disease. *Lancet*2013;381:1961-2. doi:10.1016/S0140-6736(13)61031-4.
- 408 5 Fang P, Dong S, Xiao J, et al. Regional inequality in health and its  
409 determinants: evidence from China. *Health Policy*2010;94:14-25.  
410 doi:10.1016/j.healthpol.2009.08.002.
- 411 6 Tang S, Meng Q, Chen L, et al. Tackling the challenges to health equity in  
412 China. *Lancet*2008;372:1493-501. doi:10.1016/S0140-6736(08)61364-1.
- 413 7 National Bureau of Statistics of the People's Republic of China. China  
414 Statistical Bulletin, 2015. <http://www.stats.gov.cn/tjsj/tjgb/ndtjgb/> (accessed:  
415 1 Apr 2016)

- 1  
2  
3  
4 416 8 Liu GF, Sun MP, Wang ZY, et al. Association analysis between urbanization  
5  
6 417 and non-communicable diseases and health-related behavior. *Acta Scientiarum*  
7  
8 418 *Naturalium Universitatis Pekinensis(Chinese Journal)*2016;48:478–82.
- 9  
10  
11 419 9 Upshur RE, Moineddin R, Crighton E, et al. Simplicity within complexity:  
12  
13 420 seasonality and predictability of hospital admissions in the province of Ontario  
14  
15 421 1988-2001, a population-based analysis. *BMC Health Serv Res*2005;5:13.  
16  
17 422 doi:10.1186/1472-6963-5-13.
- 18  
19  
20  
21 423 10 Sani MU, Mohammed AZ, Bapp A, et al. A three-year review of mortality  
22  
23 424 patterns in the medical wards of Aminu Kano Teaching Hospital, Kano,  
24  
25 425 Nigeria. *Niger Postgrad Med J*2007;14:347-51.
- 26  
27  
28 426 11 Duan L, Deng X, Wang Y, et al. *The National injury surveillance system in*  
29  
30 427 *China: a six-year review. Injury*2015;46:572-9.  
31  
32 428 doi:10.1016/j.injury.2014.12.013.
- 33  
34  
35  
36 429 12 Zhu M, Ruan W, Fei SJ, et al. Approaches to the evaluation of malaria  
37  
38 430 elimination at county level: case study in the Yangtze River Delta region. *Adv*  
39  
40 431 *Parasitol*2014;86:135-82. doi:10.1016/B978-0-12-800869-0.00006-8.
- 41  
42  
43 432 13 Melamed RD, Khiabani H, Rabadan R. Data-driven discovery of seasonally  
44  
45 433 linked diseases from an electronic health records system. *BMC*  
46  
47 434 *Bioinformatics*2014;15(Suppl 6):S3. doi:10.1186/1471-2105-15-S6-S3.
- 48  
49  
50  
51 435 14 Yang H, Huang X, Zhou Z, et al. Determinants of initial utilization of  
52  
53 436 community healthcare services among patients with major non-communicable  
54  
55  
56  
57  
58  
59  
60

- 1  
2  
3  
4 437 chronic diseases in south China. *PLoS ONE* 2014;9:e116051.  
5  
6 438 doi:10.1371/journal.pone.0116051.  
7  
8  
9 439 15 Zhou L. Analysis of the chronic diseases components of inpatient in a hospital  
10  
11 440 of Wuhan from 2008-2012. *Med Soc*2014;10:23-5.  
12  
13  
14 441 16 Allen L, Williams J, Townsend N, et al. Socioeconomic status and  
15  
16 442 non-communicable disease behavioural risk factors in low-income and  
17  
18 443 lower-middle-income countries: a systematic review. *Lancet Glob*  
19  
20 444 *Health*2017;5:e277-e289. doi: 10.1016/S2214-109X(17)30058-X.  
21  
22  
23  
24 445 17 Goryakin Y, Rocco L, Suhrcke M. The contribution of urbanization to  
25  
26 446 non-communicable diseases: evidence from 173 countries from 1980 to 2008.  
27  
28 447 *Econ Hum Biol*2017. doi:10.1016/j.ehb.2017.03.004.  
29  
30  
31 448 18 Zhu YJ, Yao YH, Xue SS, et al. Analysis on condition of chronic diseases,  
32  
33 449 distribution of disease spectrum and main risk factors of diseases of elderly in  
34  
35 450 Jilin Province. *Journal Jilin University (Medicine Edition) (Chinese*  
36  
37 451 *Journal)*2013;6:1275-81.  
38  
39  
40  
41 452 19 World Health Organization, Global Health Observatory Data Repository,  
42  
43 453 2016. <http://apps.who.int/gho/data/node.main.A865?lang=en> (accessed: 3 Apr  
44  
45 454 2016).  
46  
47  
48  
49 455 20 Oyebo O, Pape UJ, Laverty AA, et al. Rural, urban and migrant differences  
50  
51 456 in non-communicable disease risk-factors in middle income countries: a  
52  
53 457 cross-sectional study of WHO-SAGE data. *PLoS ONE* 2015;10:e0122747.  
54  
55 458 doi:10.1371/journal.pone.0122747.  
56  
57  
58  
59  
60

- 1  
2  
3  
4 459 21 Tao Y, Mi S, Zhou S, et al. Air pollution and hospital admissions for  
5  
6 460 respiratory diseases in Lanzhou, China. *Environ Pollut*2014;185:196-201.  
7  
8 461 doi:10.1016/j.envpol.2013.10.035.
- 9  
10  
11 462 22 Li DL, Zheng Y, Lu W. Practice and probe into prevention and control for high  
12  
13 463 incidence cancers in Shanghai. *China Cancer (Chinese Journal)*2010; 19:80-5.
- 14  
15  
16 464 23 Tu ZG. The coordination of industrial growth with environment and resource.  
17  
18 465 *Econ Res J (Chinese Journal)*2008;2:93-105.
- 19  
20  
21 466 24 Wu F. Shanghai, China – study on global ageing and adult health, 2009/10.  
22  
23 467 WAVE, 2013.
- 24  
25  
26 468 25 Ding D, Zhong X, Lau JT, et al. Behavioral medicine and prevention of  
27  
28 469 non-communicable diseases in China: current challenges and future directions.  
29  
30 470 *Int J Behav Med*2014;21:584-9. doi:10.1007/s12529-014-9393-7.
- 31  
32  
33 471 26 Zhai F, Wang H, Du S, et al. Prospective study on nutrition transition in China.  
34  
35 472 *Nutr Rev*2009;67(Suppl 1):S56–S61. doi:10.1111/j.1753-4887.2009.00160.x.
- 36  
37  
38 473 27 Liu LN. Analysis on the overstrain women in the workforce in China. *Reform &*  
39  
40 474 *Opening (Chinese Journal)*2013;1:33-4.
- 41  
42  
43 475 28 Yang H, He F, Wang T, et al. Health-related lifestyle behaviors among male  
44  
45 476 and female rural-to-urban migrant workers in Shanghai, China. *PLoS ONE*  
46  
47 477 2015;10:e0117946. doi:10.1371/journal.pone.0117946.
- 48  
49  
50 478 29 Du M, Prescott J, Kraft P, et al. Physical activity, sedentary behavior, and  
51  
52 479 leukocyte telomere length in women. *Am J Epidemiol*2012;175:414-22.  
53  
54 480 doi:10.1093/aje/kwr330.
- 55  
56  
57  
58  
59  
60

- 1  
2  
3  
4 481 30 Mathur R, Bhaskaran K, Edwards E, et al. Population trends in the 10-year  
5  
6 482 incidence and prevalence of diabetic retinopathy in the UK: a cohort study in  
7  
8  
9 483 the Clinical Practice Research Datalink 2004-2014. *BMJ Open*2017;7:e014444.  
10  
11 484 doi: 10.1136/bmjopen-2016-014444.  
12  
13  
14 485 31 Zhou XL, Wu KF, Sun BH. Analysis on the current status and development  
15  
16 486 strategies of public health physicians in community health institutions in  
17  
18 487 Shanghai. *Chinese Journal of General Practice(Chinese Journal)*2012; 10(11):  
19  
20  
21 488 1756-1757.  
22  
23  
24 489  
25  
26 490

Table 1 Demographic Characteristics of Inpatients with NCDs

| Variable          | Classification | N       | %      |
|-------------------|----------------|---------|--------|
| Gender            | Male           | 954612  | 50.05  |
|                   | Female         | 952872  | 49.95  |
| Age<br>(years)    | 0-10           | 1008    | 0.05   |
|                   | 11-20          | 14688   | 0.77   |
|                   | 21-30          | 47484   | 2.49   |
|                   | 31-40          | 70164   | 3.68   |
|                   | 41-50          | 219060  | 11.48  |
|                   | 51-60          | 320172  | 16.79  |
|                   | 61-70          | 268176  | 14.06  |
|                   | 71-80          | 523452  | 27.44  |
|                   | >80            | 443280  | 23.24  |
| Year of admission | 2003           | 110796  | 5.81   |
|                   | 2004           | 126744  | 6.64   |
|                   | 2005           | 127704  | 6.69   |
|                   | 2006           | 135972  | 7.13   |
|                   | 2007           | 141780  | 7.43   |
|                   | 2008           | 145728  | 7.64   |
|                   | 2009           | 155220  | 8.14   |
|                   | 2010           | 157500  | 8.26   |
|                   | 2011           | 171060  | 8.97   |
|                   | 2012           | 191004  | 10.01  |
|                   | 2013           | 209100  | 10.96  |
|                   | 2014           | 234876  | 12.31  |
|                   | Total          | 1907484 | 100.00 |

Table 2 Ranking of the Most Common NCDs by Group

| Variable   | First Disease       | N(%)          | Second Disease            | N(%)         | Third Disease                 | N(%)        | Fourth Disease                        | N(%)        | Fifth Disease                         | N(%)        |
|------------|---------------------|---------------|---------------------------|--------------|-------------------------------|-------------|---------------------------------------|-------------|---------------------------------------|-------------|
| Gender     |                     |               |                           |              |                               |             |                                       |             |                                       |             |
| Male       | Cerebral infarction | 120396(12.61) | Coronary heart disease    | 66216(6.94)  | Hypertension                  | 57708(6.05) | Chronic obstructive pulmonary disease | 53904(5.65) | Chronic bronchitis                    | 45252(4.74) |
| Female     | Cerebral infarction | 91776(9.63)   | Hypertension              | 65136(6.84)  | Uterine fibroid               | 39564(4.15) | Coronary heart disease                | 31188(3.27) | Chronic bronchitis                    | 25776(2.71) |
| Age(years) |                     |               |                           |              |                               |             |                                       |             |                                       |             |
| 0-10       | Chronic tonsillitis | 264(16.19)    | Redundant prepuce         | 144(14.29)   | Adenoid vegetation            | 72(7.14)    | Adenoidal hypertrophy                 | 48(4.76)    | Tonsil hypertrophy                    | 24(2.38)    |
| 11-20      | Redundant prepuce   | 2064(14.05)   | Benign neoplasm of breast | 996(6.78)    | Spontaneous pneumothorax      | 648(4.41)   | Chronic tonsillitis                   | 552(3.76)   | Respiratory failure                   | 444(3.02)   |
| 21-30      | Redundant prepuce   | 4704(9.91)    | Benign neoplasm of breast | 2448(7.51)   | Ovarian cyst                  | 3564(5.16)  | Ureteral calculi                      | 1632(3.44)  | Chronic tonsillitis                   | 1032(2.17)  |
| 31-40      | Uterine fibroid     | 5484(7.82)    | Ovarian cyst              | 3156(4.50)   | Endometrial polyp             | 2844(4.05)  | Ureteral calculi                      | 2556(3.64)  | Hyperplasia of mammary glands         | 2268(3.23)  |
| 41-50      | Uterine fibroid     | 25644(11.71)  | Endometrial hyperplasia   | 9408(4.29)   | Hyperplasia of mammary glands | 8052(3.68)  | Endometrial polyp                     | 7404(3.38)  | Ureteral calculi                      | 5640(2.57)  |
| 51-60      | Cerebral infarction | 23124(7.22)   | Coronary heart disease    | 14016(4.38)  | Hypertension                  | 12144(3.79) | Ureteral calculi                      | 8364(2.61)  | Cerebral haemorrhage                  | 6636(2.07)  |
| 61-70      | Cerebral infarction | 29508(11.00)  | Coronary heart disease    | 14016(6.30)  | Hypertension                  | 13668(5.10) | Vertebrobasilar insufficiency         | 6480(2.42)  | Diabetes                              | 5640(2.10)  |
| 71-80      | Cerebral infarction | 75972(14.51)  | Hypertension              | 45612(8.71)  | Coronary heart disease        | 38808(7.41) | Chronic bronchitis                    | 30720(5.87) | Chronic obstructive pulmonary disease | 25536(4.88) |
| >80        | Cerebral infarction | 46560(17.58)  | Hypertension              | 31488(10.50) | Coronary heart disease        | 77928(8.51) | Chronic obstructive pulmonary disease | 36216(8.17) | Chronic bronchitis                    | 37728(7.10) |

Table 3 Distribution of Non-communicable Diseases from 2003 to 2014 in the Total Sample (%)

| Disorder                                  | 2003    | 2004    | 2005    | 2006    | 2007    | 2008    | 2009    | 2010    | 2011    | 2012    | 2013    | 2014    | Z       | P-value | Trend |
|-------------------------------------------|---------|---------|---------|---------|---------|---------|---------|---------|---------|---------|---------|---------|---------|---------|-------|
|                                           | N       | N       | N       | N       | N       | N       | N       | N       | N       | N       | N       | N       |         |         |       |
|                                           | =110796 | =126744 | =127704 | =135972 | =141780 | =145728 | =155220 | =157500 | =171060 | =191004 | =209100 | =234876 |         |         |       |
| Cancer                                    | 11.57   | 10.16   | 8.15    | 9.33    | 8.37    | 8.28    | 7.24    | 7.18    | 7.19    | 7.80    | 6.12    | 5.78    | -20.525 | <0.001  | ↓↓↓   |
| Other neoplasms                           | 6.63    | 8.05    | 7.43    | 7.41    | 5.58    | 4.55    | 5.54    | 4.45    | 4.67    | 4.55    | 4.36    | 4.01    | -20.527 | <0.001  | ↓↓↓   |
| Cardiovascular and circulatory diseases   | 28.30   | 29.38   | 29.18   | 29.52   | 31.43   | 33.33   | 34.68   | 36.21   | 35.64   | 35.65   | 34.87   | 34.60   | 19.861  | <0.001  | ↑↑↑   |
| Chronic respiratory diseases              | 13.43   | 13.46   | 13.85   | 12.98   | 13.50   | 12.85   | 12.52   | 12.45   | 11.27   | 10.89   | 9.37    | 9.40    | -18.290 | <0.001  | ↓↓↓   |
| Diabetes and blood and endocrine diseases | 1.36    | 1.43    | 1.25    | 1.26    | 1.44    | 1.46    | 1.35    | 1.75    | 1.55    | 3.67    | 6.47    | 6.74    | 41.268  | <0.001  | ↑↑↑   |
| Digestive diseases                        | 10.54   | 11.57   | 10.98   | 11.24   | 9.58    | 10.56   | 10.00   | 10.81   | 10.12   | 9.67    | 10.00   | 10.98   | -2.757  | 0.003   | ↓↓    |
| Mental and behavioural disorders          | 0.17    | 0.08    | 0.23    | 0.19    | 0.19    | 0.13    | 0.26    | 0.25    | 0.16    | 0.12    | 0.36    | 0.25    | 3.130   | 0.001   | ↑↑    |
| Musculoskeletal disorders                 | 5.44    | 4.74    | 4.85    | 4.64    | 5.18    | 4.48    | 4.58    | 3.86    | 4.67    | 4.54    | 5.80    | 6.23    | 4.668   | <0.001  | ↑↑↑   |
| Urogenital diseases                       | 14.97   | 13.24   | 15.95   | 14.93   | 15.68   | 14.65   | 13.29   | 13.12   | 15.34   | 14.81   | 13.83   | 12.72   | -5.329  | <0.001  | ↓↓↓   |
| Neurological disorders                    | 2.25    | 3.78    | 4.35    | 3.96    | 4.58    | 5.34    | 5.33    | 4.97    | 4.83    | 3.49    | 4.13    | 4.36    | 3.915   | <0.001  | ↑↑↑   |
| Sensory organ diseases                    | 4.14    | 3.20    | 2.69    | 3.15    | 3.50    | 2.97    | 3.64    | 3.18    | 2.84    | 3.26    | 3.02    | 3.15    | -2.403  | 0.008   | ↓↓    |
| Congenital anomalies                      | 0.40    | 0.44    | 0.28    | 0.38    | 0.37    | 0.26    | 0.49    | 0.41    | 0.32    | 0.28    | 0.60    | 0.63    | 3.750   | <0.001  | ↑↑↑   |
| Skin and subcutaneous disease             | 0.80    | 0.47    | 0.82    | 0.99    | 0.59    | 1.14    | 1.06    | 1.35    | 1.38    | 1.26    | 1.08    | 1.15    | 7.294   | <0.001  | ↑↑↑   |

↓↓: P<0.01, negative trend; ↓↓↓: P<0.001, negative trend; ↑↑: P<0.01, positive trend; ↑↑↑: P<0.001, positive trend.



1  
2  
3  
4  
5  
6  
7 Fig.1 Distribution of non-communicable diseases by gender

8 0: cancer, 1: other neoplasms, 2: cardiovascular and circulatory diseases, 3: chronic respiratory diseases, 4: diabetes and blood and endocrine  
9 diseases, 5: digestive diseases, 6: mental and behavioural disorders, 7: musculoskeletal disorders, 8: urogenital diseases, 9: neurological  
10 disorders, 10: sensory organ diseases, 11: congenital anomalies, 12: skin and subcutaneous diseases

11 ↓ : P<0.05, negative trend; ↓ ↓ : P<0.01, negative trend; ↓ ↓ ↓ : P<0.001, negative trend;  
12 ↑ : P<0.05, positive trend; ↑ ↑ : P<0.01, positive trend; ↑ ↑ ↑ : P<0.001, positive trend.  
13  
14  
15  
16

17 Fig. 2 Distribution of non-communicable diseases by age

18 0: cancer, 1: other neoplasms, 2: cardiovascular and circulatory diseases, 3: chronic respiratory diseases, 4: diabetes and blood and endocrine  
19 diseases, 5: digestive diseases, 6: mental and behavioural disorders, 7: musculoskeletal disorders, 8: urogenital diseases, 9: neurological  
20 disorders, 10: sensory organ diseases, 11: congenital anomalies, 12: skin and subcutaneous diseases

21 ↓ : P<0.05, negative trend; ↓ ↓ : P<0.01, negative trend; ↓ ↓ ↓ : P<0.001, negative trend;  
22 ↑ : P<0.05, positive trend; ↑ ↑ : P<0.01, positive trend; ↑ ↑ ↑ : P<0.001, positive trend.  
23  
24  
25  
26  
27  
28  
29  
30  
31  
32  
33  
34  
35  
36  
37  
38  
39  
40  
41  
42  
43  
44  
45  
46  
47  
48  
49

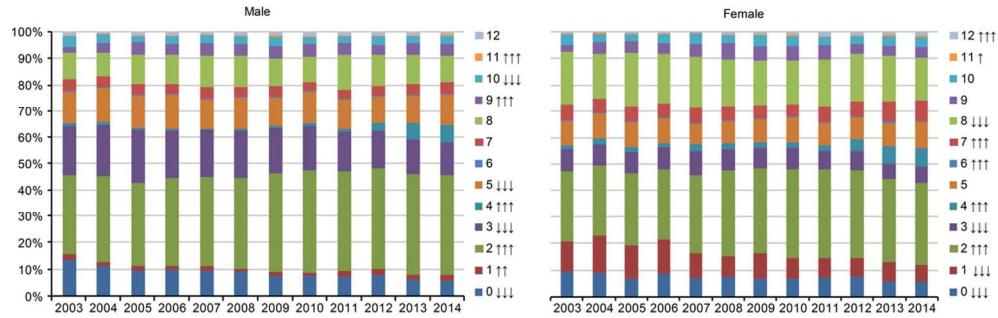

Fig.1 Distribution of non-communicable diseases by gender

0: cancer, 1: other neoplasms, 2: cardiovascular and circulatory diseases, 3: chronic respiratory diseases, 4: diabetes and blood and endocrine diseases, 5: digestive diseases, 6: mental and behavioural disorders, 7: musculoskeletal disorders, 8: urogenital diseases, 9: neurological disorders, 10: sensory organ diseases, 11: congenital anomalies, 12: skin and subcutaneous diseases

↓: P<0.05, negative trend; ↓↓: P<0.01, negative trend; ↓↓↓: P<0.001, negative trend;  
 ↑: P<0.05, positive trend; ↑↑: P<0.01, positive trend; ↑↑↑: P<0.001, positive trend.

55x17mm (600 x 600 DPI)



Fig. 2 Distribution of non-communicable diseases by age  
 0: cancer, 1: other neoplasms, 2: cardiovascular and circulatory diseases, 3: chronic respiratory diseases,  
 4: diabetes and blood and endocrine diseases, 5: digestive diseases, 6: mental and behavioural disorders,  
 7: musculoskeletal disorders, 8: urogenital diseases, 9: neurological disorders, 10: sensory organ diseases,  
 11: congenital anomalies, 12: skin and subcutaneous diseases  
 ↓: P<0.05,negative trend;↓↓: P<0.01, negative trend;↓↓↓: P<0.001,negative trend;  
 ↑: P<0.05,positive trend; ↑↑: P<0.01,positive trend;↑↑↑: P<0.001,positive trend.

48x64mm (600 x 600 DPI)

STROBE 2007 (v4) Statement—Checklist of items that should be included in reports of *cross-sectional studies*

| Section/Topic                | Item # | Recommendation                                                                                                                                                                       | Reported on page # |
|------------------------------|--------|--------------------------------------------------------------------------------------------------------------------------------------------------------------------------------------|--------------------|
| Title and abstract           | 1      | (a) Indicate the study’s design with a commonly used term in the title or the abstract                                                                                               | 1                  |
|                              |        | (b) Provide in the abstract an informative and balanced summary of what was done and what was found                                                                                  | 2                  |
| <b>Introduction</b>          |        |                                                                                                                                                                                      |                    |
| Background/rationale         | 2      | Explain the scientific background and rationale for the investigation being reported                                                                                                 | 3-5                |
| Objectives                   | 3      | State specific objectives, including any prespecified hypotheses                                                                                                                     | 5                  |
| <b>Methods</b>               |        |                                                                                                                                                                                      |                    |
| Study design                 | 4      | Present key elements of study design early in the paper                                                                                                                              | 5-6                |
| Setting                      | 5      | Describe the setting, locations, and relevant dates, including periods of recruitment, exposure, follow-up, and data collection                                                      | 5-6                |
| Participants                 | 6      | (a) Give the eligibility criteria, and the sources and methods of selection of participants                                                                                          | 7                  |
| Variables                    | 7      | Clearly define all outcomes, exposures, predictors, potential confounders, and effect modifiers. Give diagnostic criteria, if applicable                                             | 7-8                |
| Data sources/<br>measurement | 8*     | For each variable of interest, give sources of data and details of methods of assessment (measurement). Describe comparability of assessment methods if there is more than one group | 7-8                |
| Bias                         | 9      | Describe any efforts to address potential sources of bias                                                                                                                            | 7                  |
| Study size                   | 10     | Explain how the study size was arrived at                                                                                                                                            | 5-6                |
| Quantitative variables       | 11     | Explain how quantitative variables were handled in the analyses. If applicable, describe which groupings were chosen and why                                                         | 7-8                |
| Statistical methods          | 12     | (a) Describe all statistical methods, including those used to control for confounding                                                                                                | 7-8                |
|                              |        | (b) Describe any methods used to examine subgroups and interactions                                                                                                                  | 7-8                |
|                              |        | (c) Explain how missing data were addressed                                                                                                                                          | 7-8                |
|                              |        | (d) If applicable, describe analytical methods taking account of sampling strategy                                                                                                   | 7-8                |
|                              |        | (e) Describe any sensitivity analyses                                                                                                                                                | 7-8                |
| <b>Results</b>               |        |                                                                                                                                                                                      |                    |

1  
2  
3  
4  
5  
6  
7  
8  
9  
10  
11  
12  
13  
14  
15  
16  
17  
18  
19  
20  
21  
22  
23  
24  
25  
26  
27  
28  
29  
30  
31  
32  
33  
34  
35  
36  
37  
38  
39  
40  
41  
42  
43  
44  
45  
46  
47  
48  
49

|                          |     |                                                                                                                                                                                                              |       |
|--------------------------|-----|--------------------------------------------------------------------------------------------------------------------------------------------------------------------------------------------------------------|-------|
| Participants             | 13* | (a) Report numbers of individuals at each stage of study—eg numbers potentially eligible, examined for eligibility, confirmed eligible, included in the study, completing follow-up, and analysed            | N/A   |
|                          |     | (b) Give reasons for non-participation at each stage                                                                                                                                                         | N/A   |
|                          |     | (c) Consider use of a flow diagram                                                                                                                                                                           | N/A   |
| Descriptive data         | 14* | (a) Give characteristics of study participants (eg demographic, clinical, social) and information on exposures and potential confounders                                                                     | 8     |
|                          |     | (b) Indicate number of participants with missing data for each variable of interest                                                                                                                          | N/A   |
| Outcome data             | 15* | Report numbers of outcome events or summary measures                                                                                                                                                         | 8-11  |
| Main results             | 16  | (a) Give unadjusted estimates and, if applicable, confounder-adjusted estimates and their precision (eg, 95% confidence interval). Make clear which confounders were adjusted for and why they were included | N/A   |
|                          |     | (b) Report category boundaries when continuous variables were categorized                                                                                                                                    | N/A   |
|                          |     | (c) If relevant, consider translating estimates of relative risk into absolute risk for a meaningful time period                                                                                             | N/A   |
| Other analyses           | 17  | Report other analyses done—eg analyses of subgroups and interactions, and sensitivity analyses                                                                                                               | N/A   |
| <b>Discussion</b>        |     |                                                                                                                                                                                                              |       |
| Key results              | 18  | Summarise key results with reference to study objectives                                                                                                                                                     | 11-12 |
| Limitations              | 19  | Discuss limitations of the study, taking into account sources of potential bias or imprecision. Discuss both direction and magnitude of any potential bias                                                   | 15    |
| Interpretation           | 20  | Give a cautious overall interpretation of results considering objectives, limitations, multiplicity of analyses, results from similar studies, and other relevant evidence                                   | 12-15 |
| Generalisability         | 21  | Discuss the generalisability (external validity) of the study results                                                                                                                                        | 15    |
| <b>Other information</b> |     |                                                                                                                                                                                                              |       |
| Funding                  | 22  | Give the source of funding and the role of the funders for the present study and, if applicable, for the original study on which the present article is based                                                | 16    |

\*Give information separately for cases and controls in case-control studies and, if applicable, for exposed and unexposed groups in cohort and cross-sectional studies.

**Note:** An Explanation and Elaboration article discusses each checklist item and gives methodological background and published examples of transparent reporting. The STROBE checklist is best used in conjunction with this article (freely available on the Web sites of PLoS Medicine at <http://www.plosmedicine.org/>, Annals of Internal Medicine at <http://www.annals.org/>, and Epidemiology at <http://www.epidem.com/>). Information on the STROBE Initiative is available at [www.strobe-statement.org](http://www.strobe-statement.org).

# BMJ Open

## Identifying patterns of non-communicable diseases in developed eastern coastal China: A longitudinal study of electronic health records from 12 public hospitals

|                                 |                                                                                                                                                                                                                                                                                                                                                                                                                                                                                                                                                                                                                                                                                                                                                                                                                                                                                                          |
|---------------------------------|----------------------------------------------------------------------------------------------------------------------------------------------------------------------------------------------------------------------------------------------------------------------------------------------------------------------------------------------------------------------------------------------------------------------------------------------------------------------------------------------------------------------------------------------------------------------------------------------------------------------------------------------------------------------------------------------------------------------------------------------------------------------------------------------------------------------------------------------------------------------------------------------------------|
| Journal:                        | <i>BMJ Open</i>                                                                                                                                                                                                                                                                                                                                                                                                                                                                                                                                                                                                                                                                                                                                                                                                                                                                                          |
| Manuscript ID                   | bmjopen-2017-016007.R2                                                                                                                                                                                                                                                                                                                                                                                                                                                                                                                                                                                                                                                                                                                                                                                                                                                                                   |
| Article Type:                   | Research                                                                                                                                                                                                                                                                                                                                                                                                                                                                                                                                                                                                                                                                                                                                                                                                                                                                                                 |
| Date Submitted by the Author:   | 05-Jun-2017                                                                                                                                                                                                                                                                                                                                                                                                                                                                                                                                                                                                                                                                                                                                                                                                                                                                                              |
| Complete List of Authors:       | Yu, Dehua; Yangpu Hospital, Tongji University School of Medicine, Department of General Medicine<br>Shi, Jianwei; Tongji University School of Medicine; Yangpu Hospital, Tongji University School of Medicine<br>Zhang, Hanzhi; Yangpu Hospital, Tongji University School of Medicine, Department of General Medicine<br>Wang, Zhaoxin; Tongji University School of Medicine; Yangpu Hospital, Tongji University School of Medicine, Department of General Medicine<br>Lu, Yuan; Yangpu Hospital, Tongji University School of Medicine, Department of General Medicine<br>Zhang, Bin; Yangpu Hospital, Tongji University School of Medicine, Department of General Medicine<br>Pan, Ying; Yangpu Hospital, Tongji University School of Medicine<br>Wang, Bo; Yangpu Hospital, Tongji University School of Medicine, Department of General Medicine<br>Sun, Pengfei; Tongji University School of Medicine |
| <b>Primary Subject Heading</b>: | Health services research                                                                                                                                                                                                                                                                                                                                                                                                                                                                                                                                                                                                                                                                                                                                                                                                                                                                                 |
| Secondary Subject Heading:      | Evidence based practice, Global health, Health services research, Public health                                                                                                                                                                                                                                                                                                                                                                                                                                                                                                                                                                                                                                                                                                                                                                                                                          |
| Keywords:                       | Non-communicable diseases, Electronic Health Record, Eastern coastal China, Health policy < HEALTH SERVICES ADMINISTRATION & MANAGEMENT                                                                                                                                                                                                                                                                                                                                                                                                                                                                                                                                                                                                                                                                                                                                                                  |
|                                 |                                                                                                                                                                                                                                                                                                                                                                                                                                                                                                                                                                                                                                                                                                                                                                                                                                                                                                          |

SCHOLARONE™  
Manuscripts

1  
2  
3  
4 1 **Identifying patterns of non-communicable diseases in**  
5  
6 2 **developed eastern coastal China: A longitudinal study of**  
7  
8  
9 3 **electronic health records from 12 public hospitals**

4 Dehua Yu, PhD<sup>1#</sup>, Jianwei Shi, PhD<sup>12#</sup>, Hanzhi Zhang, MD<sup>1</sup>, Zhaoxin Wang, PhD<sup>12\*</sup>,  
5 Yuan Lu, MD<sup>1</sup>, Bin Zhang, MD<sup>1</sup>, Ying Pan, MD<sup>1</sup>, Bo Wang, PhD<sup>1</sup>, Pengfei Sun, BD<sup>2</sup>

6 *1 Department of General Medicine, Yangpu Hospital, Tongji University School of*  
7 *Medicine, Shanghai, 200090, China*

8 *2 Tongji University School of Medicine, Shanghai, 200092, China*

9  
10 DehuaYu: ydn1404@sina.com

11 JianweiShi: shijianwei\_amy@126.com

12 Hanzhi Zhang: drchan001@163.com

13 Zhaoxin Wang: supercell002@sina.com

14 Yuan Lu: lussy@126.com

15 Bin Zhang: metamophore@aliyun.com

16 Ying Pan: hshpanying@163.com

17 Bo Wang: bowang13241@163.com

18 Pengfei Sun: 18817599414@163.com

19  
20 # These authors are co-first authors on this paper.

21 **\*Corresponding author:**

22 **Zhaoxin Wang,**

23 Associate Professor, PhD

24 School of Medicine

25 Tongji University

26 Address: 1239 Si Ping RD, Yangpu District, Shanghai, 200092, China

27 Email: supercell002@sina.com

28 Tel: 86-13918537473

1  
2  
3  
4  
5  
6  
7  
8  
9  
10  
11  
12  
13  
14  
15  
16  
17  
18  
19  
20  
21  
22  
23  
24  
25  
26  
27  
28  
29  
30  
31

## Identifying patterns of non-communicable diseases in developed eastern coastal China: A longitudinal study of electronic health records from 12 public hospitals

32 Dehua Yu, PhD<sup>1#</sup>, Jianwei Shi, PhD<sup>1,2#</sup>, Hanzhi Zhang, MD<sup>1</sup>, Zhaoxin Wang, PhD<sup>1,2\*</sup>,  
33 Yuan Lu, MD<sup>1</sup>, Bin Zhang, MD<sup>1</sup>, Ying Pan, MD<sup>1</sup>, Bo Wang, PhD<sup>1</sup>, Pengfei Sun, BD<sup>2</sup>

34 *1 Department of General Medicine, Yangpu Hospital, Tongji University School of  
35 Medicine, Shanghai, 200090, China*

36 *2 Tongji University School of Medicine, Shanghai, 200092, China*

37 #: Dehua Yu and Jianwei Shi are co-first authors on this paper

38 \* Corresponding author: Zhaoxin Wang, Email: supercell002@sina.com

39 **ABSTRACT**

40 **Objective:** Few studies have examined the spectrum and trends of non-communicable  
41 diseases (NCDs) in inpatients in eastern coastal China, which is transforming from an  
42 industrial economy to a service-oriented economy and is the most economically  
43 developed region in the country. This study aimed to dynamically elucidate the  
44 spectrum and characteristics of severe NCDs in eastern coastal China by analysing  
45 patients' longitudinal electronic health records (EHRs).

46 **Setting:** To monitor the spectrum of NCDs dynamically, we extracted the EHR data  
47 from 12 general tertiary hospitals in eastern coastal China from 2003 to 2014. The  
48 rankings of and trends in the proportions of different NCDs presented by inpatients in  
49 different gender and age groups were calculated and analysed.

50 **Participants:** We obtained a total sample of 1,907,484 inpatients with NCDs from



1  
2  
3  
4 51 2003 to 2014, 50.05% of whom were male and 81.53% were aged 50 years or older.  
5  
6

7 52 **Results:** There was an increase in the number of total NCD inpatients in eastern  
8  
9 53 coastal China from 2003 to 2014. However, the proportion of chronic respiratory  
10  
11 54 diseases and cancer inpatients decreased over the 12-year period. Compared with men,  
12  
13 55 women displayed a significant increase in the proportion of mental and behavioural  
14  
15 56 disorders ( $P<0.001$ ) over time. Additionally, digestive diseases and sensory organ  
16  
17 57 diseases significantly decreased among men, but not women. The older group  
18  
19 58 accounted for a larger and growing proportion of the NCD inpatients, and the most  
20  
21 59 common conditions in this group were cerebral infarctions, coronary heart disease and  
22  
23 60 hypertension. In addition, the proportion of 21- to 50-year-old inpatients with diabetes,  
24  
25 61 blood diseases or endocrine diseases skyrocketed from 2003 to 2014 ( $P<0.001$ ).  
26  
27  
28  
29  
30  
31

32 62 **Conclusions:** The burden of inpatients' NCDs increased rapidly, particularly among  
33  
34 63 women and younger people. The NCD spectrum observed in eastern coastal China is  
35  
36 64 a good source of evidence for developing prevention guides for regions experiencing  
37  
38 65 transition.  
39  
40  
41

42 66 **Keywords:** Non-communicable diseases; Electronic Health Record; Eastern coastal  
43  
44 67 China; Health policy  
45  
46  
47

#### 48 68 **Strengths and limitations**

- 49  
50  
51 69 ● The concept of using longitudinal EHRs to document the proportion of NCD  
52  
53 70 admissions in eastern coastal China hospitals can provide a reasonably simple and  
54  
55 71 precise method of examining NCD trends over time.  
56  
57  
58  
59  
60

1  
2  
3  
4 72 ● This evidence provides a good foundation for the development of NCD  
5  
6 73 prevention guides or policies for similar developing regions that are undergoing  
7  
8 74 or will undergo an economic transformation.

9  
10  
11 75 ● The generalisability and reliability of the findings of this study are a concern, and  
12  
13 76 more hospitals from other parts of China should be included in future studies to  
14  
15 77 make a persuasive comparison.  
16  
17  
18  
19 78

## 20 21 22 79 **INTRODUCTION**

23  
24 80 In recent years, an epidemiological shift in morbidity and mortality from infectious  
25  
26 81 diseases and malnutrition to non-communicable diseases(NCDs) has occurred in  
27  
28 82 many countries, including China[1-3]. NCDs have become the major causes of death  
29  
30 83 in China and globally. According to the 2012 WHO data repository, 87% of deaths in  
31  
32 84 China were associated with NCDs[1]. The Global Burden of Disease Study(GBD)  
33  
34 85 revealed that of the 8.3 million deaths in China in 2010, 7.0 million resulted from  
35  
36 86 NCDs[3]. Stroke, ischaemic heart disease, cancers, and chronic obstructive  
37  
38 87 pulmonary disease are now the leading causes of premature death in China, and the  
39  
40 88 burden of these diseases is substantial[4].  
41  
42  
43  
44  
45  
46  
47

48 89 Previous research on the epidemiological patterns of NCDs in China has primarily  
49  
50 90 focused on the entire nation or cross-sectional studies of specific regions[1-6].

51  
52 91 However, both the WHO and the GBD have acknowledged that a national analysis  
53  
54 92 conducted in a country as large and diverse as China can mask substantial variations  
55  
56  
57  
58  
59  
60

---

1  
2  
3  
4 93 in key outcomes[3,5]. In addition, few studies have examined the NCD spectrum in  
5  
6 94 inpatients, which can reflect the severe state of NCDs. In this study, we conducted a  
7  
8  
9 95 longitudinal study of NCD patterns in five provinces in eastern coastal China:  
10  
11 96 Shandong, Jiangsu, Zhejiang, Shanghai and Guangdong provinces. Geographically  
12  
13  
14 97 speaking, these provinces are located in the three most productive and dynamic  
15  
16 98 regions of China: the Bohai Sea, the Yangtze River Delta and the Pearl River Delta.  
17  
18  
19 99 The gross regional domestic product in these five provinces accounts for  
20  
21 100 approximately half that of the 32 provinces/autonomous regions/municipalities in  
22  
23  
24 101 China. These provinces' gross domestic product(GDP) per capita far exceeded the  
25  
26 102 average value in China from 2005 to 2014[7] and was similar to the GDP of other  
27  
28  
29 103 developed countries in Asia. Moreover, since the 2000s, this region has experienced  
30  
31 104 dramatic changes in both the economic and health sectors[8]. According to the Health  
32  
33  
34 105 Statistics Yearbook, in 2015, the average life expectancy in eastern coastal China was  
35  
36 106 around 78 years old, which is greater than the national average of approximately 76  
37  
38  
39 107 years old[7]. Due to the rapid urbanisation, economic development and population  
40  
41 108 ageing in eastern coastal China, NCDs and disabilities are becoming more  
42  
43  
44 109 prevalent[1,3], and the spectrum of inpatients' diseases in this area is speculated to  
45  
46 110 largely differ from that in other regions of China. More specific guidelines for  
47  
48  
49 111 preventing and curing NCDs that are tailored to the disease patterns observed in  
50  
51 112 eastern coastal China must be developed.

52  
53  
54  
55 113 In exploring disease patterns, particularly in longitudinal studies based on a large  
56  
57  
58 114 sample, second-hand data may be regarded as a good source. In particular, data from  
59  
60

1  
2  
3  
4 115 hospitals' electronic health record(EHR) systems have unique advantages. For  
5  
6 116 instance, Upshur et al. applied time series methods to a population-based retrospective  
7  
8  
9 117 cohort for the 52 most common causes of hospital admissions in the province of  
10  
11 118 Ontario from 1988 to 2001 and showed that hospital admissions displayed systematic  
12  
13  
14 119 patterns that are understandable, predictable, and reasonably accurate[9]. Using data  
15  
16 120 from the admission and discharge/death register, Sani et al.[10] conducted a  
17  
18  
19 121 three-year review of mortality patterns. Their result supported the emerging trend of a  
20  
21 122 combined burden of communicable diseases and NCDs. In China, disease surveillance  
22  
23  
24 123 is conducted by the National Disease Surveillance Points System, which was founded  
25  
26 124 in 1978; however, this system reports primarily on communicable diseases and reports  
27  
28  
29 125 on only a small subset of NCDs, such as cancer[11,12]. Given these factors, the  
30  
31 126 current study used the hospital-based EHR system as a data source. This relatively  
32  
33  
34 127 new database compiles clinical information from a large number of patients in a  
35  
36 128 computationally accessible form. The EHR system provides us with a unique  
37  
38  
39 129 opportunity to elucidate the relatively severe NCD epidemiology and includes a  
40  
41 130 diverse array of NCDs[13].

42  
43  
44  
45 131 The aim of this study was to dynamically elucidate the spectrum and characteristics of  
46  
47 132 severe NCDs in eastern coastal China by analysing hospitals' longitudinal EHR data.  
48  
49  
50 133 The results can provide insight into the aetiology of NCDs and aid in the development  
51  
52 134 of evidence-based clinical guidelines for preventing and curing NCDs. In addition, the  
53  
54  
55 135 distribution of NCDs in eastern coastal China can inform the development of clinical  
56  
57  
58 136 guidelines for NCDs in other regions or countries in transition.

---

## 137 **METHODS**

### 138 **Study design and data collection**

139 Longitudinal data(2003-2014) on NCDs were extracted from the EHR systems of 12  
140 general tertiary hospitals in Shandong(2 hospitals), Jiangsu(2 hospitals), Zhejiang(2  
141 hospitals), Shanghai(3 hospitals) and Guangdong Provinces(3 hospitals).

142 A multistage sample was obtained. To obtain a representative sample, when choosing  
143 the sites, we first selected 3 cities that represented high, middle, and low  
144 socioeconomic statuses, as defined by GDP level, in each of the 5 provinces. Second,  
145 in each city, we selected the largest general tertiary hospital, resulting in 15 sampled  
146 hospitals. However, we did not obtain consent from three tertiary hospitals in some  
147 cities in Shandong, Jiangsu and Zhejiang Provinces due to political reasons regarding  
148 EHR data collection. In China, EHR data are not openly available but can be obtained  
149 from consenting hospitals with the help of health authorities. However, for several  
150 reasons, the health authorities cannot support us in the future. Thus, 12 general  
151 tertiary hospitals were included in the study. In this study, one hospital in Shandong  
152 Province in the low socioeconomic group, one hospital in Jiangsu Province in the  
153 middle socioeconomic group, and one hospital in Zhejiang Province in the high group  
154 were missing from the dataset. However, due to the distribution of the missing  
155 hospitals, it was thought that lack of participation of these hospitals would not  
156 influence the final results. In most large cities in China, EHRs have used a uniform  
157 version composed of two parts since 2001. The first part contains the patients'

1  
2  
3  
4 158 personal information, including their gender, age, identification card number,  
5  
6 159 profession, address, etc. This information is usually provided by the patients or their  
7  
8  
9 160 family. The second part contains the inpatients' hospitalisation information, including  
10  
11 161 their diagnosis code, discharge status, pathologic diagnosis (if possible), operation  
12  
13 162 code (if possible), etc. This information is provided by the patient's physician, which  
14  
15 163 ensures its reliability. In terms of the diagnosis code, each inpatient is coded with an  
16  
17 164 ICD-9 disease code by their physician. In addition, the GBD has well defined  
18  
19 165 categories for NCDs. Therefore, we extracted the inpatients' NCDs using their ICD-9  
20  
21 166 codes and classified them into different categories.  
22  
23  
24  
25  
26

27 167 We selected tertiary hospitals for this study. In China, hospitals are classified into  
28  
29 168 three categories according to their major functions. Although community institutions  
30  
31 169 are intended to serve as gatekeepers, a patient's freedom to select medical facilities  
32  
33 170 and doctors is not restricted by policies or health insurance coverage. Consequently,  
34  
35 171 patients with acute or chronic diseases frequently visit the higher-tier, more  
36  
37 172 sophisticated or specialised, and more expensive hospitals rather than community  
38  
39 173 health centres, and many of the community health centres do not have hospital beds.  
40  
41 174 In addition, their EHR systems are defective and incomplete, limiting the use of the  
42  
43 175 information they contain[14]. Typically, the largest tertiary hospitals see most of the  
44  
45 176 patients discharged in their cities.  
46  
47  
48  
49  
50  
51  
52  
53

#### 54 177 **Study subjects**

55  
56  
57 178 In this study, information on inpatients with NCDs was extracted from the 2003-2014  
58  
59  
60

---

1  
2  
3  
4 179 hospital EHR data of each hospital, and only individuals who had been admitted to  
5  
6 180 these hospitals during this period were included. We chose 2003 as the starting point  
7  
8  
9 181 because the first EHR system was formally launched in these hospitals in that year. In  
10  
11 182 our study, the EHR systems of the tertiary hospitals include the admission information  
12  
13 183 of patients who received their first diagnosis of an NCD between 2003 and 2014. We  
14  
15 184 excluded any duplicated patients by searching and analysing their Identification Card  
16  
17 185 number in the EHRs. In addition, because these hospitals may also attract patients  
18  
19 186 from other districts or provinces, the inclusion criteria stipulated that participants must  
20  
21 187 have a fixed address in the relevant region, regardless of whether they were registered  
22  
23 188 or nonregistered residents. After excluding non-residents, NCD information for a total  
24  
25 189 of 1,907,484 inpatients was stripped of identifying information and extracted from the  
26  
27 190 hospitals' EHR systems. These patients were admitted to a variety of hospital  
28  
29 191 divisions, and according to the ICD-9 and GBD NCD classification, we extracted the  
30  
31 192 NCD patients from all of the inpatients and classified them into various disease  
32  
33 193 groups based on their first-list diagnosis. The final data set included the residents'  
34  
35 194 basic demographic information(gender and age) and the presence of chronic  
36  
37 195 diseases(disease system/category, disorder and year of admission). Because there was  
38  
39 196 no significant difference in disease spectrum between regions with high, middle and  
40  
41 197 low socioeconomic status within eastern coastal China, we did not include region as a  
42  
43 198 factor.

### 199 **Statistical analysis**

200 All data were analysed by using SAS Software 9.20. Basic descriptive statistics were

---

1  
2  
3  
4 201 used to analyse the inpatients' personal characteristics(gender, age, and year of  
5  
6 202 admission). The NCD systems and the most common disorders within each disease  
7  
8 203 system were ranked according to their relative proportions. The Cochran-Armitage  
9  
10 204 Chi-square test was then used to examine significant increases or decreases in the  
11  
12 205 proportions of NCDs in disease systems across different gender and age groups  
13  
14 206 between 2003 and 2014.  
15  
16  
17  
18

### 19 207 **Ethics statement**

20 208 All research activities were conducted with integrity according to generally accepted  
21  
22 209 ethical principles and were approved by the Ethics Committees of Tongji  
23  
24 210 University(ref: LL-2016-ZRKX-017). This study presented minimal risk of harm to  
25  
26 211 its subjects, and the data were collected anonymously. None of the inpatients'  
27  
28 212 personal information included in the database was available to individuals outside of  
29  
30 213 the research team.  
31  
32  
33  
34  
35  
36  
37  
38

## 39 214 **RESULTS**

### 40 215 **Description of the personal characteristics of inpatients with NCDs**

41  
42 216 The personal characteristics of the studied population are summarised in Table 1. This  
43  
44 217 population included 1,907,484 inpatients with NCDs, 50.05% of whom were male.  
45  
46 218 Most of these patients were aged 50 years or older(81.53%). Furthermore, the number  
47  
48 219 of inpatients with NCDs increased from 2003 to 2014.  
49  
50  
51  
52  
53  
54

### 55 220 **Ranking of the disorders in all NCDs categories within gender and age groups**



1  
2  
3  
4 221 The ranks and proportions of all NCDs for each gender group are presented in Table 2.  
5  
6 222 Among males, each of the five most common disorders represented more than 4.0%  
7  
8 223 of the total NCDs from 2003 to 2014. The three most frequently occurring disorders  
9  
10 224 among male inpatients were cerebral infarction(12.61%), coronary heart  
11  
12 225 disease(6.94%) and hypertension(6.05%). Similarly, those for women showed that  
13  
14 226 cerebral infarction(9.63%) occurred most frequently. However, hypertension(6.84%)  
15  
16 227 and uterine fibroids(4.15%) were the second and third most frequently occurring  
17  
18 228 NCDs among women, respectively.  
19  
20  
21  
22  
23  
24

25 229 Table 2 also shows the ranks of the most frequently occurring disorders across age  
26  
27 230 groups. The older group(>41 years of age) accounted for a larger proportion of NCD  
28  
29 231 inpatients, and the most common conditions in this group were cerebral infarction,  
30  
31 232 coronary heart disease and hypertension. In the 11- to 50-year-old group, urogenital  
32  
33 233 diseases, endocrine diseases and neoplasms including redundant prepuce, benign  
34  
35 234 neoplasm of the breast and endometrial hyperplasia occurred frequently in men and  
36  
37 235 women. In addition, hypertension, chronic obstructive pulmonary disease and diabetes  
38  
39 236 were more common among the elderly than among individuals in the other age  
40  
41 237 groups.  
42  
43  
44  
45  
46  
47

#### 48 **Distribution of NCDs across the different groups from 2003 to 2014**

49

50  
51 239 Table 3 shows the changes in the proportions of the 12 NCD categories from 2003 to  
52  
53 240 2014. A significant decrease in the occurrence of cancer( $Z=-20.525$ ,  $P<0.001$ ), other  
54  
55 241 neoplasms( $Z=-20.525$ ,  $P<0.001$ ), chronic respiratory diseases( $Z=-18.290$ ,  $P<0.001$ ),  
56  
57  
58  
59  
60

1  
2  
3  
4 242 urogenital diseases( $Z=-5.329$ ,  $P<0.001$ ) and sensory organ diseases( $Z=-2.403$ ,  
5  
6 243  $P=0.008$ ) was found. In contrast, the proportions of other NCDs increased to various  
7  
8  
9 244 extents over the 12-year period. Notably, the proportion of patients with diabetes and  
10  
11 245 blood and endocrine diseases increased approximately four-fold(from 1.36% to  
12  
13  
14 246 6.74%).

15  
16  
17 247 As shown in Figure 1, the 12-year NCD percentages recorded in the hospitals varied  
18  
19  
20 248 widely by gender. The percentage of both men and women who were diagnosed with  
21  
22  
23 249 diabetes or blood and endocrine diseases increased substantially. We found a  
24  
25 250 significant increase in mental and behavioural disorders( $Z=5.130$ ,  $P<0.001$ ), and  
26  
27  
28 251 musculoskeletal disorders( $Z=6.896$ ,  $P<0.001$ ) among women but no significant  
29  
30 252 changes among men. Also, it is worth noting that the percentage of men who were  
31  
32  
33 253 diagnosed with digestive diseases( $Z=-4.284$ ,  $P<0.001$ ) and  
34  
35 254 sensory organ diseases( $Z=-3.342$ ,  $P<0.001$ ) reduced significantly from 2003 to 2014,  
36  
37  
38 255 but there was no significant change for women. In addition, although the proportion  
39  
40 256 of cancer and other neoplasms decreased in women, this decrease was less  
41  
42  
43 257 pronounced than that found in men.

44  
45  
46 258 Changes in NCDs proportions across age groups were also examined(Figure 2).  
47  
48  
49 259 NCDs were relatively rare among patients aged 10 years or younger, but chronic  
50  
51  
52 260 respiratory diseases occurred most frequently in this group. For 11-20-year-old  
53  
54 261 subjects, sensory organ diseases( $Z=3.304$ ,  $P<0.001$ ) and cardiovascular and  
55  
56 262 circulatory diseases( $Z=2.090$ ,  $P=0.018$ ) occurred more frequently over time. We  
57  
58  
59  
60

1  
2  
3  
4 263 noted the proportions of patients with diabetes or blood and endocrine diseases  
5  
6 264 increased in these two groups and in the below 30-year-old group. For the 41- to  
7  
8  
9 265 50-year-old group, the number of patients diagnosed with cancer decreased  
10  
11 266 significantly but the proportions of patients with cardiovascular, circulatory( $Z=7.918$ ,  
12  
13  
14 267  $P<0.001$ ) and digestive diseases( $Z=3.086$ ,  $P<0.01$ ) increased to a greater extent than  
15  
16 268 in the younger population. In the  $\geq 50$ -year-old group, the proportion of patients with  
17  
18  
19 269 diabetes or blood and endocrine diseases increased substantially( $P<0.001$ ).

## 20 21 22 270 **DISCUSSION**

23  
24  
25 271 By analysing the EHR information of inpatients with NCDs at 12 hospitals in eastern  
26  
27  
28 272 coastal China, our research team was able to elucidate the severe NCD patterns in a  
29  
30 273 relatively unbiased fashion and to confirm that NCDs displayed regional  
31  
32 274 heterogeneity to some extent. The increase in the number of NCD inpatients in eastern  
33  
34  
35 275 coastal China from 2003 to 2014 may be due to several reasons. First, owing to  
36  
37  
38 276 improvements in economics, health insurance and convenient transportation in China,  
39  
40 277 even people with minor diseases may go to larger hospitals because they are equipped  
41  
42  
43 278 with better devices and doctors and do not adhere to strict referral policies. Second,  
44  
45 279 the increase in the number of severe NCD patients appears to mainly result from the  
46  
47  
48 280 higher pressure, lack of exercise, and increased air pollution, among other factors in  
49  
50 281 rapidly developed cities[14,15], which is consistent with the findings of Allen et  
51  
52  
53 282 al.(2017) who, in a systematic review, showed that NCD behavioural risk factors is  
54  
55 283 well established in high-income countries. For example, high socioeconomic groups  
56  
57  
58 284 were found to be less physically active and to consume more fats, salt, and processed  
59  
60

1  
2  
3  
4 285 food than low socioeconomic status individuals[16].  
5  
6

7 286 In order of ranks, cardiovascular and circulatory diseases, urogenital diseases, chronic  
8  
9  
10 287 respiratory diseases, and digestive diseases were the most common NCDs in this  
11  
12  
13 288 region. In eastern coastal China, severe cardiovascular and circulatory diseases may  
14  
15 289 occur more frequently because of the greater degree of urbanisation and greater  
16  
17 290 proportion of ageing population in the region[2,3]. Goryakin et al.(2017) studied the  
18  
19 291 contribution of urbanisation to NCDs in 173 countries and found that when shifting  
20  
21 292 from rural to urban areas, the average body mass index (BMI), total cholesterol level  
22  
23 293 and systolic blood pressure, increased[17], demonstrating that high urbanisation  
24  
25 294 increases the occurrence of cardiovascular and circulatory diseases, which is in  
26  
27 295 consistent with this study. In addition, the frequency of urogenital diseases (second)  
28  
29 296 and digestive diseases (fourth) in this region is potentially because of the more rapid  
30  
31 297 pace of modern life, more sedentary lifestyle and longer working hours. In our search  
32  
33 298 of existing studies on inpatients with NCDs, we rarely found this spectrum at the top  
34  
35 299 of the list in other regions[18]. However, interestingly, this study revealed that the  
36  
37 300 proportion of chronic respiratory diseases and cancer inpatients decreased over the  
38  
39 301 12-year period, in stark contrast to the changes in the incidence observed throughout  
40  
41 302 China[19,20]. Often, previous studies have concluded that the incidence of respiratory  
42  
43 303 diseases is increasing, likely due to ambient air pollution and tobacco use, resulting in  
44  
45 304 tremendous threats to respiratory health[3,21]. This difference may be a result of the  
46  
47 305 data because the reported incidence also includes mild respiratory diseases. However,  
48  
49 306 the opposite trend found in inpatients in eastern coastal China may have also resulted  
50  
51  
52  
53  
54  
55  
56  
57  
58  
59  
60

1  
2  
3  
4 307 from this region's transition from a heavy industrial district to a technologically  
5  
6 308 focused area, which has been associated with a substantial reduction in environmental  
7  
8  
9 309 pollution. Moreover, regional public health media campaigns have focused on cancer  
10  
11 310 prevention and the regional government has promoted early screening and the  
12  
13  
14 311 treatment of major cancers since the 2000s, particularly in these developed areas in  
15  
16 312 China where the government can invest more money into public health activities[22],  
17  
18  
19 313 which likely explains the reduced proportion of cancer patients. However, PM 2.5 air  
20  
21 314 pollution, household pollution, tobacco use, residents' insufficient knowledge of NCD  
22  
23  
24 315 prevention, etc. remain persistent risk factors in eastern coastal China and deserve  
25  
26 316 considerable attention[23,24].  
27  
28  
29

30 317 Concerning the distribution of NCDs among the different age groups, we found that  
31  
32 318 the older age group accounted for the largest proportion of individuals with NCDs,  
33  
34  
35 319 with cerebral infarction, coronary heart disease and hypertension being the most  
36  
37 320 common conditions. This result is consistent with the epidemiological features of  
38  
39  
40 321 NCDs[25,26] and indicates that these NCDs represent a significant burden on the  
41  
42 322 Chinese government. Interestingly, in addition to the nearly fourfold increase in the  
43  
44  
45 323 proportion of older patients suffering from NCDs such as diabetes or blood and  
46  
47 324 endocrine diseases between 2003 and 2014, the proportion of individuals with these  
48  
49  
50 325 diseases between the ages of 30 and 50 also increased significantly. However, this  
51  
52 326 result could have been due to suboptimal nutrient intake and the high level of  
53  
54  
55 327 psychological pressure on the young population in this fast-paced area, a relationship  
56  
57 328 that warrants further attention.  
58  
59  
60

1  
2  
3  
4 329 Additionally, the observation that an increasing proportion of women exhibit severe  
5  
6 330 mental and behavioural disorders may indicate that, currently, women in China are  
7  
8  
9 331 employed in the same fast-paced jobs or roles as men[27]. Furthermore, women are  
10  
11 332 expected to devote more effort to balancing family and work[28,29] in developed  
12  
13  
14 333 areas or cities, which is undoubtedly challenging for them and may induce the onset  
15  
16 334 of these diseases. These factors imply that specific risk factors for frequently  
17  
18  
19 335 occurring NCDs in different gender groups should be monitored in addition to the  
20  
21 336 diseases or groups that are currently monitored and screened for due to their  
22  
23  
24 337 significant burden. Other frequently occurring NCD diseases and a wider population  
25  
26 338 should also be targeted, such as the prevention and screening of digestive diseases in  
27  
28  
29 339 females or increased preventative measures for diabetes and blood, endocrine,  
30  
31 340 cardiovascular and circulatory diseases among the younger and population. In  
32  
33  
34 341 addition, these observations call for an improvement and greater investment in the  
35  
36 342 prevention and control of NCDs by community health institutions, which has lagged  
37  
38  
39 343 even in the economically well-developed eastern coastal regions of China as well as  
40  
41 344 in China as a whole compared with western countries[30]. For instance, community  
42  
43  
44 345 health institutions typically compete with hospitals to attract patients, and only public  
45  
46 346 health physicians (different from general physicians) take the responsibility of  
47  
48  
49 347 providing health education and follow-up visits for NCD patients. According to a  
50  
51 348 survey conducted at a representative community health institution in Shanghai,  
52  
53  
54 349 public health physicians accounted for only 7.94% of total health personnel, and are  
55  
56 350 therefore in great shortage. Undoubtedly, reducing the incidence of NCDs and  
57  
58  
59  
60

1  
2  
3  
4 351 improving national health are significant political and public issues for China[31].  
5  
6

7 352 **Limitations**

8  
9  
10 353 In this study, there were several limitations. First, the sampled hospitals were the  
11  
12 354 largest hospitals in eastern coastal cities. These cities were selected to increase the  
13  
14  
15 355 sample's representativeness of eastern coastal China. However, the generalisability  
16  
17 356 and reliability of the findings are a concern. Because the EHR included a large  
18  
19  
20 357 number of inpatients with NCDs, it was a precise data source for determining the  
21  
22 358 status of and trends in the occurrence of different diseases. To reduce selection bias,  
23  
24  
25 359 more representative hospitals from each of the cities must be investigated. Second,  
26  
27 360 because socioeconomic data was absent in the EHRs, we were unable to compare the  
28  
29  
30 361 differences in socioeconomic groups in this study. Third, because the period of data  
31  
32 362 collection spanned a long time, there may be some bias related to disease diagnosis  
33  
34  
35 363 caused by changes in policy, as well as changes in the availability of new treatments  
36  
37 364 or therapies. Such changes could have resulted in patients with a given condition in  
38  
39  
40 365 the past becoming more or less likely to be inpatients in the present day. Fourth,  
41  
42 366 because few longitudinal studies examining the spectrum of NCDs among many  
43  
44  
45 367 hospitals' inpatients have been conducted in other areas of China, it was difficult to  
46  
47 368 compare the current findings regarding inpatients' NCDs with those in other parts of  
48  
49  
50 369 China.

51  
52  
53 370 **CONCLUSIONS**

54  
55  
56 371 In summary, the spectrum of NCD inpatients from 12 hospitals exhibits the severe  
57  
58  
59  
60

1  
2  
3  
4 372 NCDs condition and spectrum in eastern coastal China to a certain extent. Specific  
5  
6 373 NCDs rapidly increased in women and the younger population over the studied  
7  
8  
9 374 12-year period, underscoring the importance of healthcare policies or guidelines for  
10  
11 375 developing countries or regions such as China. However, due to the limited  
12  
13 376 generalisability and reliability of this study, stronger support must be obtained  
14  
15 377 through future studies on the spectrum of inpatients' NCDs in eastern coastal China  
16  
17  
18 378 and other regions.

## 21 379 **Abbreviations**

22 380 Non-communicable diseases: NCDs

23  
24 381 GDP: Gross domestic product

## 28 29 302 **Acknowledgements**

31 383 The authors appreciate the assistance of all the hospitals involved in this research  
32  
33 384 project in collecting the data.

## 34 35 385 **Funding**

36 386 The design of this study was financially supported by the Shanghai Health Policy  
37  
38 387 Program (2016HP043). Data collection, analysis and interpretation were funded as  
39  
40 388 part of a Central University Special Funds for Scientific Research Project  
41  
42 389 (1500219099), and the writing and revision of the manuscript was funded by the  
43  
44 390 National Natural Science Foundation of China (71603182) and the Shanghai Health  
45  
46 391 Bureau Program (201440344).

## 47 48 392 **Availability of data and materials**



1  
2  
3  
4 393 All relevant data are available in the Figshare database under the DOI:

5  
6 394 <https://figshare.com/s/f79b2b4e686d1d477527>

7  
8  
9 395 **Authors' contributions**

10  
11 396 Conceived and designed the experiments: DHY, JWS and ZXW. Analysed the data:

12  
13 397 JWS, HZZ and YL. Contributed reagents/materials/analysis tools: YL, BZ, YP, BW

14  
15  
16 398 and PFS. Wrote the paper: DHY and JWS.

17  
18  
19 399 **Competing interests**

20  
21 400 The authors have declared that they have no competing interests.

22  
23  
24  
25 401

26  
27 402 **REFERENCES**

28  
29  
30 403 1 World Health Organization. Non communicable diseases progress. *Monitor*.

31  
32 404 [http://apps.who.int/iris/bitstream/10665/184688/1/9789241509459\\_eng.pdf](http://apps.who.int/iris/bitstream/10665/184688/1/9789241509459_eng.pdf)

33  
34  
35 405 (accessed: 1 Apr 2016), 2015.

36  
37 406 2 Lim SS, Vos T, Flaxman AD, et al. A comparative risk assessment of burden

38  
39  
40 407 of disease and injury attributable to 67 risk factors and risk factor clusters in

41  
42 408 21 regions, 1990-2010: a systematic analysis for the global Burden of Disease

43  
44  
45 409 Study 2010. *Lancet*2012;380:2224-60. doi:10.1016/S0140-6736(12)61766-8.

46  
47 410 3 Yang G, Wang Y, Zeng Y, et al. Rapid health transition in China, 1990-2010:

48  
49  
50 411 findings from the Global Burden of Disease Study 2010.

51  
52 412 *Lancet*2013;381:1987-2015. doi:10.1016/S0140-6736(13)61097-1.

53  
54  
55 413 4 Liu Y, Yang G, Zeng Y, et al. Policy dialogue on China's changing burden of

56  
57  
58 414 disease. *Lancet*2013;381:1961-2. doi:10.1016/S0140-6736(13)61031-4.

- 1  
2  
3  
4 415 5 Fang P, Dong S, Xiao J, et al. Regional inequality in health and its  
5  
6 416 determinants: evidence from China. *Health Policy*2010;94:14-25.  
7  
8 417 doi:10.1016/j.healthpol.2009.08.002.  
9  
10  
11 418 6 Tang S, Meng Q, Chen L, et al. Tackling the challenges to health equity in  
12  
13 419 China. *Lancet*2008;372:1493-501. doi:10.1016/S0140-6736(08)61364-1.  
14  
15  
16 420 7 National Bureau of Statistics of the People's Republic of China. China  
17  
18 421 Statistical Bulletin, 2015. <http://www.stats.gov.cn/tjsj/tjgb/ndtjgb/> (accessed:  
19  
20 422 1 Apr 2016)  
21  
22  
23 423 8 Liu GF, Sun MP, Wang ZY, et al. Association analysis between urbanization  
24  
25 424 and non-communicable diseases and health-related behavior. *Acta Scientiarum*  
26  
27 425 *Naturalium Universitatis Pekinensis(Chinese Journal)*2016;48:478–82.  
28  
29  
30 426 9 Upshur RE, Moineddin R, Crighton E, et al. Simplicity within complexity:  
31  
32 427 seasonality and predictability of hospital admissions in the province of Ontario  
33  
34 428 1988-2001, a population-based analysis. *BMC Health Serv Res*2005;5:13.  
35  
36 429 doi:10.1186/1472-6963-5-13.  
37  
38  
39 430 10 Sani MU, Mohammed AZ, Bapp A, et al. A three-year review of mortality  
40  
41 431 patterns in the medical wards of Aminu Kano Teaching Hospital, Kano,  
42  
43 432 Nigeria. *Niger Postgrad Med J*2007;14:347-51.  
44  
45  
46 433 11 Duan L, Deng X, Wang Y, et al. *The National injury surveillance system in*  
47  
48 434 China: a six-year review. *Injury*2015;46:572-9.  
49  
50 435 doi:10.1016/j.injury.2014.12.013.  
51  
52  
53  
54  
55  
56  
57  
58  
59  
60

- 1  
2  
3  
4 436 12 Zhu M, Ruan W, Fei SJ, et al. Approaches to the evaluation of malaria  
5  
6 437 elimination at county level: case study in the Yangtze River Delta region. *Adv*  
7  
8 438 *Parasitol*2014;86:135-82. doi:10.1016/B978-0-12-800869-0.00006-8.  
9  
10  
11 439 13 Melamed RD, Khiabani H, Rabadan R. Data-driven discovery of seasonally  
12  
13 440 linked diseases from an electronic health records system. *BMC*  
14  
15 441 *Bioinformatics*2014;15(Suppl 6):S3. doi:10.1186/1471-2105-15-S6-S3.  
16  
17  
18 442 14 Yang H, Huang X, Zhou Z, et al. Determinants of initial utilization of  
19  
20 443 community healthcare services among patients with major non-communicable  
21  
22 444 chronic diseases in south China. *PLoS ONE* 2014;9:e116051.  
23  
24  
25 445 doi:10.1371/journal.pone.0116051.  
26  
27  
28 446 15 Zhou L. Analysis of the chronic diseases components of inpatient in a hospital  
29  
30 447 of Wuhan from 2008-2012. *Med Soc*2014;10:23-5.  
31  
32  
33 448 16 Allen L, Williams J, Townsend N, et al. Socioeconomic status and  
34  
35 449 non-communicable disease behavioural risk factors in low-income and  
36  
37 450 lower-middle-income countries: a systematic review. *Lancet Glob*  
38  
39 451 *Health*2017;5:e277-e289. doi: 10.1016/S2214-109X(17)30058-X.  
40  
41  
42 452 17 Goryakin Y, Rocco L, Suhrcke M. The contribution of urbanization to  
43  
44 453 non-communicable diseases: evidence from 173 countries from 1980 to 2008.  
45  
46 454 *Econ Hum Biol*2017. doi:10.1016/j.ehb.2017.03.004.  
47  
48  
49 455 18 Zhu YJ, Yao YH, Xue SS, et al. Analysis on condition of chronic diseases,  
50  
51 456 distribution of disease spectrum and main risk factors of diseases of elderly in  
52  
53  
54  
55  
56  
57  
58  
59  
60

- 1  
2  
3  
4 457 Jilin Province. *Journal Jilin University (Medicine Edition) (Chinese*  
5  
6 458 *Journal)*2013;6:1275-81.  
7  
8  
9 459 19 World Health Organization, Global Health Observatory Data Repository,  
10  
11 460 2016. <http://apps.who.int/gho/data/node.main.A865?lang=en> (accessed: 3 Apr  
12  
13 461 2016).  
14  
15  
16 462 20 Oyebo O, Pape UJ, Laverty AA, et al. Rural, urban and migrant differences  
17  
18 463 in non-communicable disease risk-factors in middle income countries: a  
19  
20  
21 464 cross-sectional study of WHO-SAGE data. *PLoS ONE* 2015;10:e0122747.  
22  
23 465 doi:10.1371/journal.pone.0122747.  
24  
25  
26 466 21 Tao Y, Mi S, Zhou S, et al. Air pollution and hospital admissions for  
27  
28 467 respiratory diseases in Lanzhou, China. *Environ Pollut*2014;185:196-201.  
29  
30 468 doi:10.1016/j.envpol.2013.10.035.  
31  
32  
33  
34 469 22 Li DL, Zheng Y, Lu W. Practice and probe into prevention and control for high  
35  
36 470 incidence cancers in Shanghai. *China Cancer (Chinese Journal)*2010; 19:80-5.  
37  
38  
39 471 23 Tu ZG. The coordination of industrial growth with environment and resource.  
40  
41 472 *Econ Res J (Chinese Journal)*2008;2:93-105.  
42  
43  
44 473 24 Wu F. Shanghai, China – study on global ageing and adult health, 2009/10.  
45  
46 474 WAVE, 2013.  
47  
48  
49 475 25 Ding D, Zhong X, Lau JT, et al. Behavioral medicine and prevention of  
50  
51 476 non-communicable diseases in China: current challenges and future directions.  
52  
53 477 *Int J Behav Med*2014;21:584-9. doi:10.1007/s12529-014-9393-7.  
54  
55  
56  
57  
58  
59  
60

- 1  
2  
3  
4 478 26 Zhai F, Wang H, Du S, et al. Prospective study on nutrition transition in China.  
5  
6 479 *Nutr Rev*2009;67(Suppl 1):S56–S61. doi:10.1111/j.1753-4887.2009.00160.x.  
7  
8  
9 480 27 Liu LN. Analysis on the overstrain women in the workforce in China. *Reform &*  
10  
11 481 *Opening (Chinese Journal)*2013;1:33-4.  
12  
13  
14 482 28 Yang H, He F, Wang T, et al. Health-related lifestyle behaviors among male  
15  
16 483 and female rural-to-urban migrant workers in Shanghai, China. *PLoS ONE*  
17  
18 484 2015;10:e0117946. doi:10.1371/journal.pone.0117946.  
19  
20  
21 485 29 Du M, Prescott J, Kraft P, et al. Physical activity, sedentary behavior, and  
22  
23 486 leukocyte telomere length in women. *Am J Epidemiol*2012;175:414-22.  
24  
25 487 doi:10.1093/aje/kwr330.  
26  
27  
28  
29 488 30 Mathur R, Bhaskaran K, Edwards E, et al. Population trends in the 10-year  
30  
31 489 incidence and prevalence of diabetic retinopathy in the UK: a cohort study in  
32  
33 490 the Clinical Practice Research Datalink 2004-2014. *BMJ Open*2017;7:e014444.  
34  
35 491 doi: 10.1136/bmjopen-2016-014444.  
36  
37  
38  
39 492 31 Zhou XL, Wu KF, Sun BH. Analysis on the current status and development  
40  
41 493 strategies of public health physicians in community health institutions in  
42  
43 494 Shanghai. *Chinese Journal of General Practice(Chinese Journal)*2012; 10(11):  
44  
45 495 1756-1757.  
46  
47  
48  
49  
50  
51  
52  
53  
54  
55  
56  
57  
58  
59  
60

496 Table 1 Demographic Characteristics of Inpatients with NCDs

| Variable          | Classification | N       | %      |
|-------------------|----------------|---------|--------|
| Gender            | Male           | 954612  | 50.05  |
|                   | Female         | 952872  | 49.95  |
| Age<br>(years)    | 0-10           | 1008    | 0.05   |
|                   | 11-20          | 14688   | 0.77   |
|                   | 21-30          | 47484   | 2.49   |
|                   | 31-40          | 70164   | 3.68   |
|                   | 41-50          | 219060  | 11.48  |
|                   | 51-60          | 320172  | 16.79  |
|                   | 61-70          | 268176  | 14.06  |
|                   | 71-80          | 523452  | 27.44  |
|                   | >80            | 443280  | 23.24  |
| Year of admission | 2003           | 110796  | 5.81   |
|                   | 2004           | 126744  | 6.64   |
|                   | 2005           | 127704  | 6.69   |
|                   | 2006           | 135972  | 7.13   |
|                   | 2007           | 141780  | 7.43   |
|                   | 2008           | 145728  | 7.64   |
|                   | 2009           | 155220  | 8.14   |
|                   | 2010           | 157500  | 8.26   |
|                   | 2011           | 171060  | 8.97   |
|                   | 2012           | 191004  | 10.01  |
|                   | 2013           | 209100  | 10.96  |
|                   | 2014           | 234876  | 12.31  |
|                   | Total          | 1907484 | 100.00 |

Table 2 Ranking of the Most Common NCDs by Group

| Variable   | First Disease       | N(%)          | Second Disease            | N(%)         | Third Disease                 | N(%)        | Fourth Disease                        | N(%)        | Fifth Disease                         | N(%)        |
|------------|---------------------|---------------|---------------------------|--------------|-------------------------------|-------------|---------------------------------------|-------------|---------------------------------------|-------------|
| Gender     |                     |               |                           |              |                               |             |                                       |             |                                       |             |
| Male       | Cerebral infarction | 120396(12.61) | Coronary heart disease    | 66216(6.94)  | Hypertension                  | 57708(6.05) | Chronic obstructive pulmonary disease | 53904(5.65) | Chronic bronchitis                    | 45252(4.74) |
| Female     | Cerebral infarction | 91776(9.63)   | Hypertension              | 65136(6.84)  | Uterine fibroid               | 39564(4.15) | Coronary heart disease                | 31188(3.27) | Chronic bronchitis                    | 25776(2.71) |
| Age(years) |                     |               |                           |              |                               |             |                                       |             |                                       |             |
| 0-10       | Chronic tonsillitis | 264(16.19)    | Redundant prepuce         | 144(14.29)   | Adenoid vegetation            | 72(7.14)    | Adenoidal hypertrophy                 | 48(4.76)    | Tonsil hypertrophy                    | 24(2.38)    |
| 11-20      | Redundant prepuce   | 2064(14.05)   | Benign neoplasm of breast | 996(6.78)    | Spontaneous pneumothorax      | 648(4.41)   | Chronic tonsillitis                   | 552(3.76)   | Respiratory failure                   | 444(3.02)   |
| 21-30      | Redundant prepuce   | 4704(9.91)    | Benign neoplasm of breast | 2448(7.51)   | Ovarian cyst                  | 3564(5.16)  | Ureteral calculi                      | 1632(3.44)  | Chronic tonsillitis                   | 1032(2.17)  |
| 31-40      | Uterine fibroid     | 5484(7.82)    | Ovarian cyst              | 3156(4.50)   | Endometrial polyp             | 2844(4.05)  | Ureteral calculi                      | 2556(3.64)  | Hyperplasia of mammary glands         | 2268(3.23)  |
| 41-50      | Uterine fibroid     | 25644(11.71)  | Endometrial hyperplasia   | 9408(4.29)   | Hyperplasia of mammary glands | 8052(3.68)  | Endometrial polyp                     | 7404(3.38)  | Ureteral calculi                      | 5640(2.57)  |
| 51-60      | Cerebral infarction | 23124(7.22)   | Coronary heart disease    | 14016(4.38)  | Hypertension                  | 12144(3.79) | Ureteral calculi                      | 8364(2.61)  | Cerebral haemorrhage                  | 6636(2.07)  |
| 61-70      | Cerebral infarction | 29508(11.00)  | Coronary heart disease    | 14016(6.30)  | Hypertension                  | 13668(5.10) | Vertebrobasilar insufficiency         | 6480(2.42)  | Diabetes                              | 5640(2.10)  |
| 71-80      | Cerebral infarction | 75972(14.51)  | Hypertension              | 45612(8.71)  | Coronary heart disease        | 38808(7.41) | Chronic bronchitis                    | 30720(5.87) | Chronic obstructive pulmonary disease | 25536(4.88) |
| >80        | Cerebral infarction | 46560(17.58)  | Hypertension              | 31488(10.50) | Coronary heart disease        | 77928(8.51) | Chronic obstructive pulmonary disease | 36216(8.17) | Chronic bronchitis                    | 37728(7.10) |

Table 3 Distribution of Non-communicable Diseases from 2003 to 2014 in the Total Sample (%)

| Disorder                                  | 2003    | 2004    | 2005    | 2006    | 2007    | 2008    | 2009    | 2010    | 2011    | 2012    | 2013    | 2014    | Z       | P-value | Trend |
|-------------------------------------------|---------|---------|---------|---------|---------|---------|---------|---------|---------|---------|---------|---------|---------|---------|-------|
|                                           | N       | N       | N       | N       | N       | N       | N       | N       | N       | N       | N       | N       |         |         |       |
|                                           | =110796 | =126744 | =127704 | =135972 | =141780 | =145728 | =155220 | =157500 | =171060 | =191004 | =209100 | =234876 |         |         |       |
| Cancer                                    | 11.57   | 10.16   | 8.15    | 9.33    | 8.37    | 8.28    | 7.24    | 7.18    | 7.19    | 7.80    | 6.12    | 5.78    | -20.525 | <0.001  | ↓↓↓   |
| Other neoplasms                           | 6.63    | 8.05    | 7.43    | 7.41    | 5.58    | 4.55    | 5.54    | 4.45    | 4.67    | 4.55    | 4.36    | 4.01    | -20.527 | <0.001  | ↓↓↓   |
| Cardiovascular and circulatory diseases   | 28.30   | 29.38   | 29.18   | 29.52   | 31.43   | 33.33   | 34.68   | 36.21   | 35.64   | 35.65   | 34.87   | 34.60   | 19.861  | <0.001  | ↑↑↑   |
| Chronic respiratory diseases              | 13.43   | 13.46   | 13.85   | 12.98   | 13.50   | 12.85   | 12.52   | 12.45   | 11.27   | 10.89   | 9.37    | 9.40    | -18.290 | <0.001  | ↓↓↓   |
| Diabetes and blood and endocrine diseases | 1.36    | 1.43    | 1.25    | 1.26    | 1.44    | 1.46    | 1.35    | 1.75    | 1.55    | 3.67    | 6.47    | 6.74    | 41.268  | <0.001  | ↑↑↑   |
| Digestive diseases                        | 10.54   | 11.57   | 10.98   | 11.24   | 9.58    | 10.56   | 10.00   | 10.81   | 10.12   | 9.67    | 10.00   | 10.98   | -2.757  | 0.003   | ↓↓    |
| Mental and behavioural disorders          | 0.17    | 0.08    | 0.23    | 0.19    | 0.19    | 0.13    | 0.26    | 0.25    | 0.16    | 0.12    | 0.36    | 0.25    | 3.130   | 0.001   | ↑↑    |
| Musculoskeletal disorders                 | 5.44    | 4.74    | 4.85    | 4.64    | 5.18    | 4.48    | 4.58    | 3.86    | 4.67    | 4.54    | 5.80    | 6.23    | 4.668   | <0.001  | ↑↑↑   |
| Urogenital diseases                       | 14.97   | 13.24   | 15.95   | 14.93   | 15.68   | 14.65   | 13.29   | 13.12   | 15.34   | 14.81   | 13.83   | 12.72   | -5.329  | <0.001  | ↓↓↓   |
| Neurological disorders                    | 2.25    | 3.78    | 4.35    | 3.96    | 4.58    | 5.34    | 5.33    | 4.97    | 4.83    | 3.49    | 4.13    | 4.36    | 3.915   | <0.001  | ↑↑↑   |
| Sensory organ diseases                    | 4.14    | 3.20    | 2.69    | 3.15    | 3.50    | 2.97    | 3.64    | 3.18    | 2.84    | 3.26    | 3.02    | 3.15    | -2.403  | 0.008   | ↓↓    |
| Congenital anomalies                      | 0.40    | 0.44    | 0.28    | 0.38    | 0.37    | 0.26    | 0.49    | 0.41    | 0.32    | 0.28    | 0.60    | 0.63    | 3.750   | <0.001  | ↑↑↑   |
| Skin and subcutaneous disease             | 0.80    | 0.47    | 0.82    | 0.99    | 0.59    | 1.14    | 1.06    | 1.35    | 1.38    | 1.26    | 1.08    | 1.15    | 7.294   | <0.001  | ↑↑↑   |

↓↓: P<0.01, negative trend; ↓↓↓: P<0.001, negative trend; ↑↑: P<0.01, positive trend; ↑↑↑: P<0.001, positive trend.



1  
2  
3  
4  
5  
6  
7  
8  
9  
10  
11  
12  
13  
14  
15  
16  
17  
18  
19  
20  
21  
22  
23  
24  
25  
26  
27  
28  
29  
30  
31  
32  
33  
34  
35  
36  
37  
38  
39  
40  
41  
42  
43  
44  
45  
46  
47  
48  
49

Fig.1 Distribution of non-communicable diseases by gender

0: cancer, 1: other neoplasms, 2: cardiovascular and circulatory diseases, 3: chronic respiratory diseases, 4: diabetes and blood and endocrine diseases, 5: digestive diseases, 6: mental and behavioural disorders, 7: musculoskeletal disorders, 8: urogenital diseases, 9: neurological disorders, 10: sensory organ diseases, 11: congenital anomalies, 12: skin and subcutaneous diseases

↓ : P<0.05, negative trend; ↓ ↓ : P<0.01, negative trend; ↓ ↓ ↓ : P<0.001, negative trend;

↑ : P<0.05, positive trend; ↑ ↑ : P<0.01, positive trend; ↑ ↑ ↑ : P<0.001, positive trend.

Fig. 2 Distribution of non-communicable diseases by age

0: cancer, 1: other neoplasms, 2: cardiovascular and circulatory diseases, 3: chronic respiratory diseases, 4: diabetes and blood and endocrine diseases, 5: digestive diseases, 6: mental and behavioural disorders, 7: musculoskeletal disorders, 8: urogenital diseases, 9: neurological disorders, 10: sensory organ diseases, 11: congenital anomalies, 12: skin and subcutaneous diseases

↓ : P<0.05, negative trend; ↓ ↓ : P<0.01, negative trend; ↓ ↓ ↓ : P<0.001, negative trend;

↑ : P<0.05, positive trend; ↑ ↑ : P<0.01, positive trend; ↑ ↑ ↑ : P<0.001, positive trend.



Fig.1 Distribution of non-communicable diseases by gender

0: cancer, 1: other neoplasms, 2: cardiovascular and circulatory diseases, 3: chronic respiratory diseases, 4: diabetes and blood and endocrine diseases, 5: digestive diseases, 6: mental and behavioural disorders, 7: musculoskeletal disorders, 8: urogenital diseases, 9: neurological disorders, 10: sensory organ diseases, 11: congenital anomalies, 12: skin and subcutaneous diseases

↓: P<0.05, negative trend; ↓↓: P<0.01, negative trend; ↓↓↓: P<0.001, negative trend;

↑: P<0.05, positive trend; ↑↑: P<0.01, positive trend; ↑↑↑: P<0.001, positive trend.

55x17mm (600 x 600 DPI)



Fig. 2 Distribution of non-communicable diseases by age  
 0: cancer, 1: other neoplasms, 2: cardiovascular and circulatory diseases, 3: chronic respiratory diseases,  
 4: diabetes and blood and endocrine diseases, 5: digestive diseases, 6: mental and behavioural disorders,  
 7: musculoskeletal disorders, 8: urogenital diseases, 9: neurological disorders, 10: sensory organ diseases,  
 11: congenital anomalies, 12: skin and subcutaneous diseases  
 ↓: P<0.05,negative trend;↓↓: P<0.01, negative trend;↓↓↓: P<0.001,negative trend;  
 ↑: P<0.05,positive trend; ↑↑: P<0.01,positive trend;↑↑↑: P<0.001,positive trend.

48x64mm (600 x 600 DPI)

STROBE 2007 (v4) Statement—Checklist of items that should be included in reports of *cross-sectional studies*

| Section/Topic                | Item # | Recommendation                                                                                                                                                                       | Reported on page # |
|------------------------------|--------|--------------------------------------------------------------------------------------------------------------------------------------------------------------------------------------|--------------------|
| Title and abstract           | 1      | (a) Indicate the study's design with a commonly used term in the title or the abstract                                                                                               | 1                  |
|                              |        | (b) Provide in the abstract an informative and balanced summary of what was done and what was found                                                                                  | 2                  |
| <b>Introduction</b>          |        |                                                                                                                                                                                      |                    |
| Background/rationale         | 2      | Explain the scientific background and rationale for the investigation being reported                                                                                                 | 3-5                |
| Objectives                   | 3      | State specific objectives, including any prespecified hypotheses                                                                                                                     | 5                  |
| <b>Methods</b>               |        |                                                                                                                                                                                      |                    |
| Study design                 | 4      | Present key elements of study design early in the paper                                                                                                                              | 5-6                |
| Setting                      | 5      | Describe the setting, locations, and relevant dates, including periods of recruitment, exposure, follow-up, and data collection                                                      | 5-6                |
| Participants                 | 6      | (a) Give the eligibility criteria, and the sources and methods of selection of participants                                                                                          | 7                  |
| Variables                    | 7      | Clearly define all outcomes, exposures, predictors, potential confounders, and effect modifiers. Give diagnostic criteria, if applicable                                             | 7-8                |
| Data sources/<br>measurement | 8*     | For each variable of interest, give sources of data and details of methods of assessment (measurement). Describe comparability of assessment methods if there is more than one group | 7-8                |
| Bias                         | 9      | Describe any efforts to address potential sources of bias                                                                                                                            | 7                  |
| Study size                   | 10     | Explain how the study size was arrived at                                                                                                                                            | 5-6                |
| Quantitative variables       | 11     | Explain how quantitative variables were handled in the analyses. If applicable, describe which groupings were chosen and why                                                         | 7-8                |
| Statistical methods          | 12     | (a) Describe all statistical methods, including those used to control for confounding                                                                                                | 7-8                |
|                              |        | (b) Describe any methods used to examine subgroups and interactions                                                                                                                  | 7-8                |
|                              |        | (c) Explain how missing data were addressed                                                                                                                                          | 7-8                |
|                              |        | (d) If applicable, describe analytical methods taking account of sampling strategy                                                                                                   | 7-8                |
|                              |        | (e) Describe any sensitivity analyses                                                                                                                                                | 7-8                |
| <b>Results</b>               |        |                                                                                                                                                                                      |                    |

|                          |     |                                                                                                                                                                                                              |       |
|--------------------------|-----|--------------------------------------------------------------------------------------------------------------------------------------------------------------------------------------------------------------|-------|
| Participants             | 13* | (a) Report numbers of individuals at each stage of study—eg numbers potentially eligible, examined for eligibility, confirmed eligible, included in the study, completing follow-up, and analysed            | N/A   |
|                          |     | (b) Give reasons for non-participation at each stage                                                                                                                                                         | N/A   |
|                          |     | (c) Consider use of a flow diagram                                                                                                                                                                           | N/A   |
| Descriptive data         | 14* | (a) Give characteristics of study participants (eg demographic, clinical, social) and information on exposures and potential confounders                                                                     | 8     |
|                          |     | (b) Indicate number of participants with missing data for each variable of interest                                                                                                                          | N/A   |
| Outcome data             | 15* | Report numbers of outcome events or summary measures                                                                                                                                                         | 8-11  |
| Main results             | 16  | (a) Give unadjusted estimates and, if applicable, confounder-adjusted estimates and their precision (eg, 95% confidence interval). Make clear which confounders were adjusted for and why they were included | N/A   |
|                          |     | (b) Report category boundaries when continuous variables were categorized                                                                                                                                    | N/A   |
|                          |     | (c) If relevant, consider translating estimates of relative risk into absolute risk for a meaningful time period                                                                                             | N/A   |
| Other analyses           | 17  | Report other analyses done—eg analyses of subgroups and interactions, and sensitivity analyses                                                                                                               | N/A   |
| <b>Discussion</b>        |     |                                                                                                                                                                                                              |       |
| Key results              | 18  | Summarise key results with reference to study objectives                                                                                                                                                     | 11-12 |
| Limitations              | 19  | Discuss limitations of the study, taking into account sources of potential bias or imprecision. Discuss both direction and magnitude of any potential bias                                                   | 15    |
| Interpretation           | 20  | Give a cautious overall interpretation of results considering objectives, limitations, multiplicity of analyses, results from similar studies, and other relevant evidence                                   | 12-15 |
| Generalisability         | 21  | Discuss the generalisability (external validity) of the study results                                                                                                                                        | 15    |
| <b>Other information</b> |     |                                                                                                                                                                                                              |       |
| Funding                  | 22  | Give the source of funding and the role of the funders for the present study and, if applicable, for the original study on which the present article is based                                                | 16    |

\*Give information separately for cases and controls in case-control studies and, if applicable, for exposed and unexposed groups in cohort and cross-sectional studies.

**Note:** An Explanation and Elaboration article discusses each checklist item and gives methodological background and published examples of transparent reporting. The STROBE checklist is best used in conjunction with this article (freely available on the Web sites of PLoS Medicine at <http://www.plosmedicine.org/>, Annals of Internal Medicine at <http://www.annals.org/>, and Epidemiology at <http://www.epidem.com/>). Information on the STROBE Initiative is available at [www.strobe-statement.org](http://www.strobe-statement.org).
